# Supplementary material for: Efficacy and safety of clozapine in psychotic disorders—a systematic quantitative meta-review
Source: PubMed Central journal article supplement (PMC8458455; doi:10.1038/s41398-021-01613-2), 2021-09-22

# S 1 Substance abuse as continuous outcome

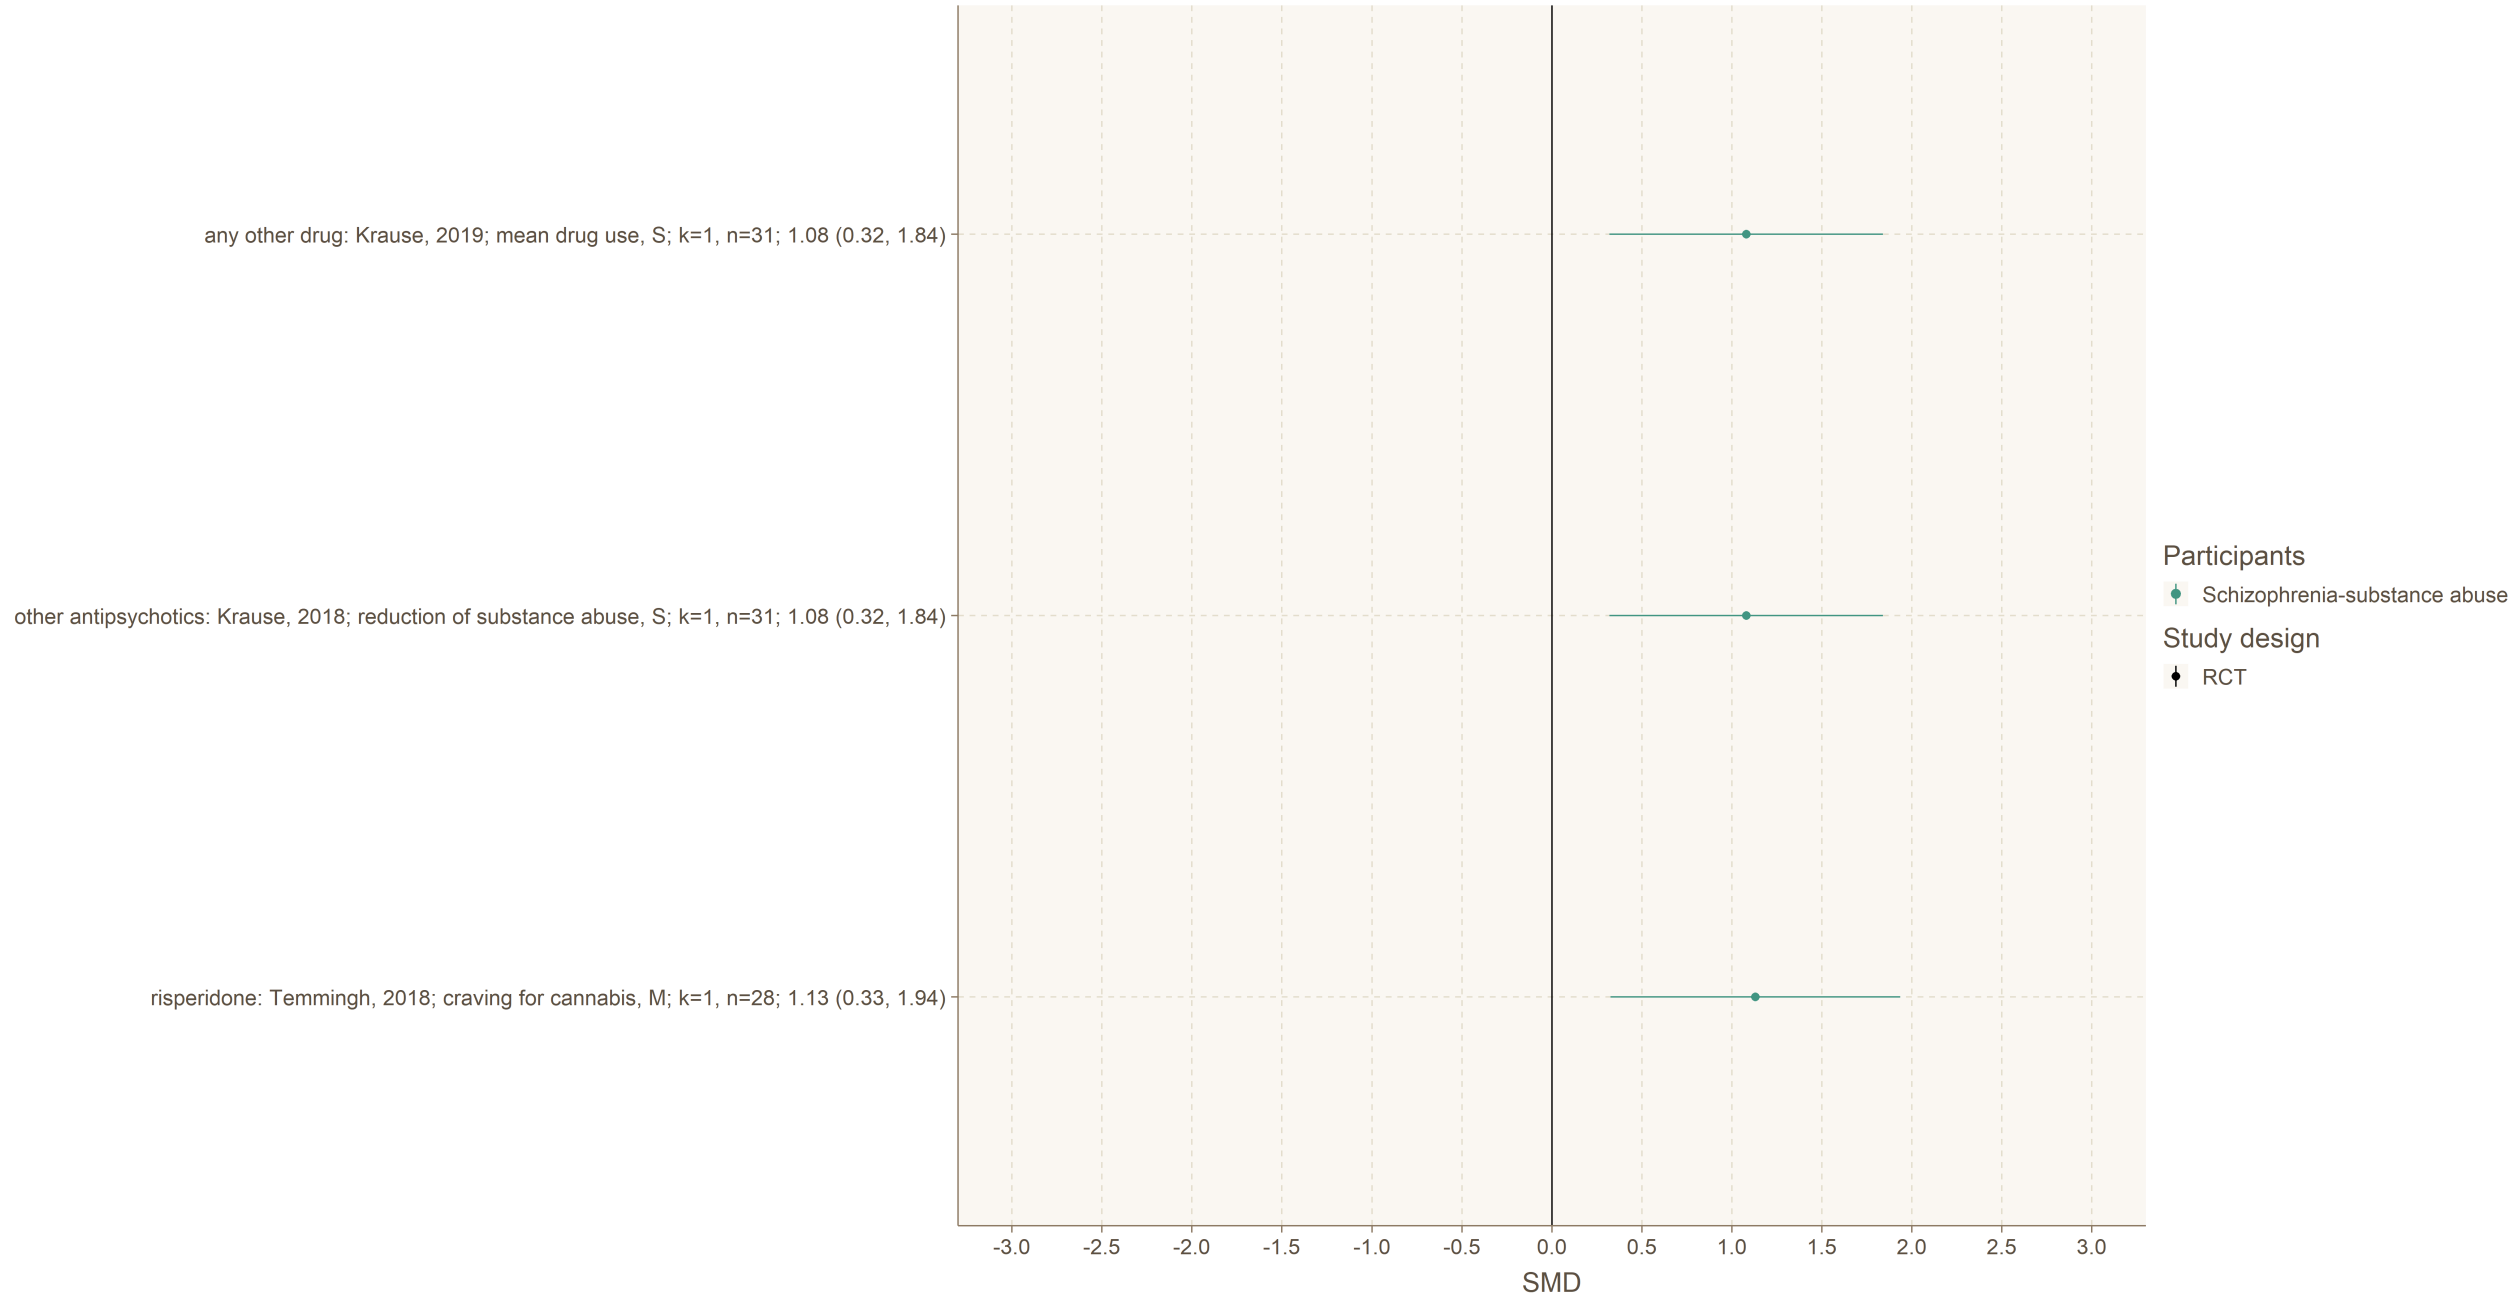

## S 2 Substance abuse as dichotomous outcome

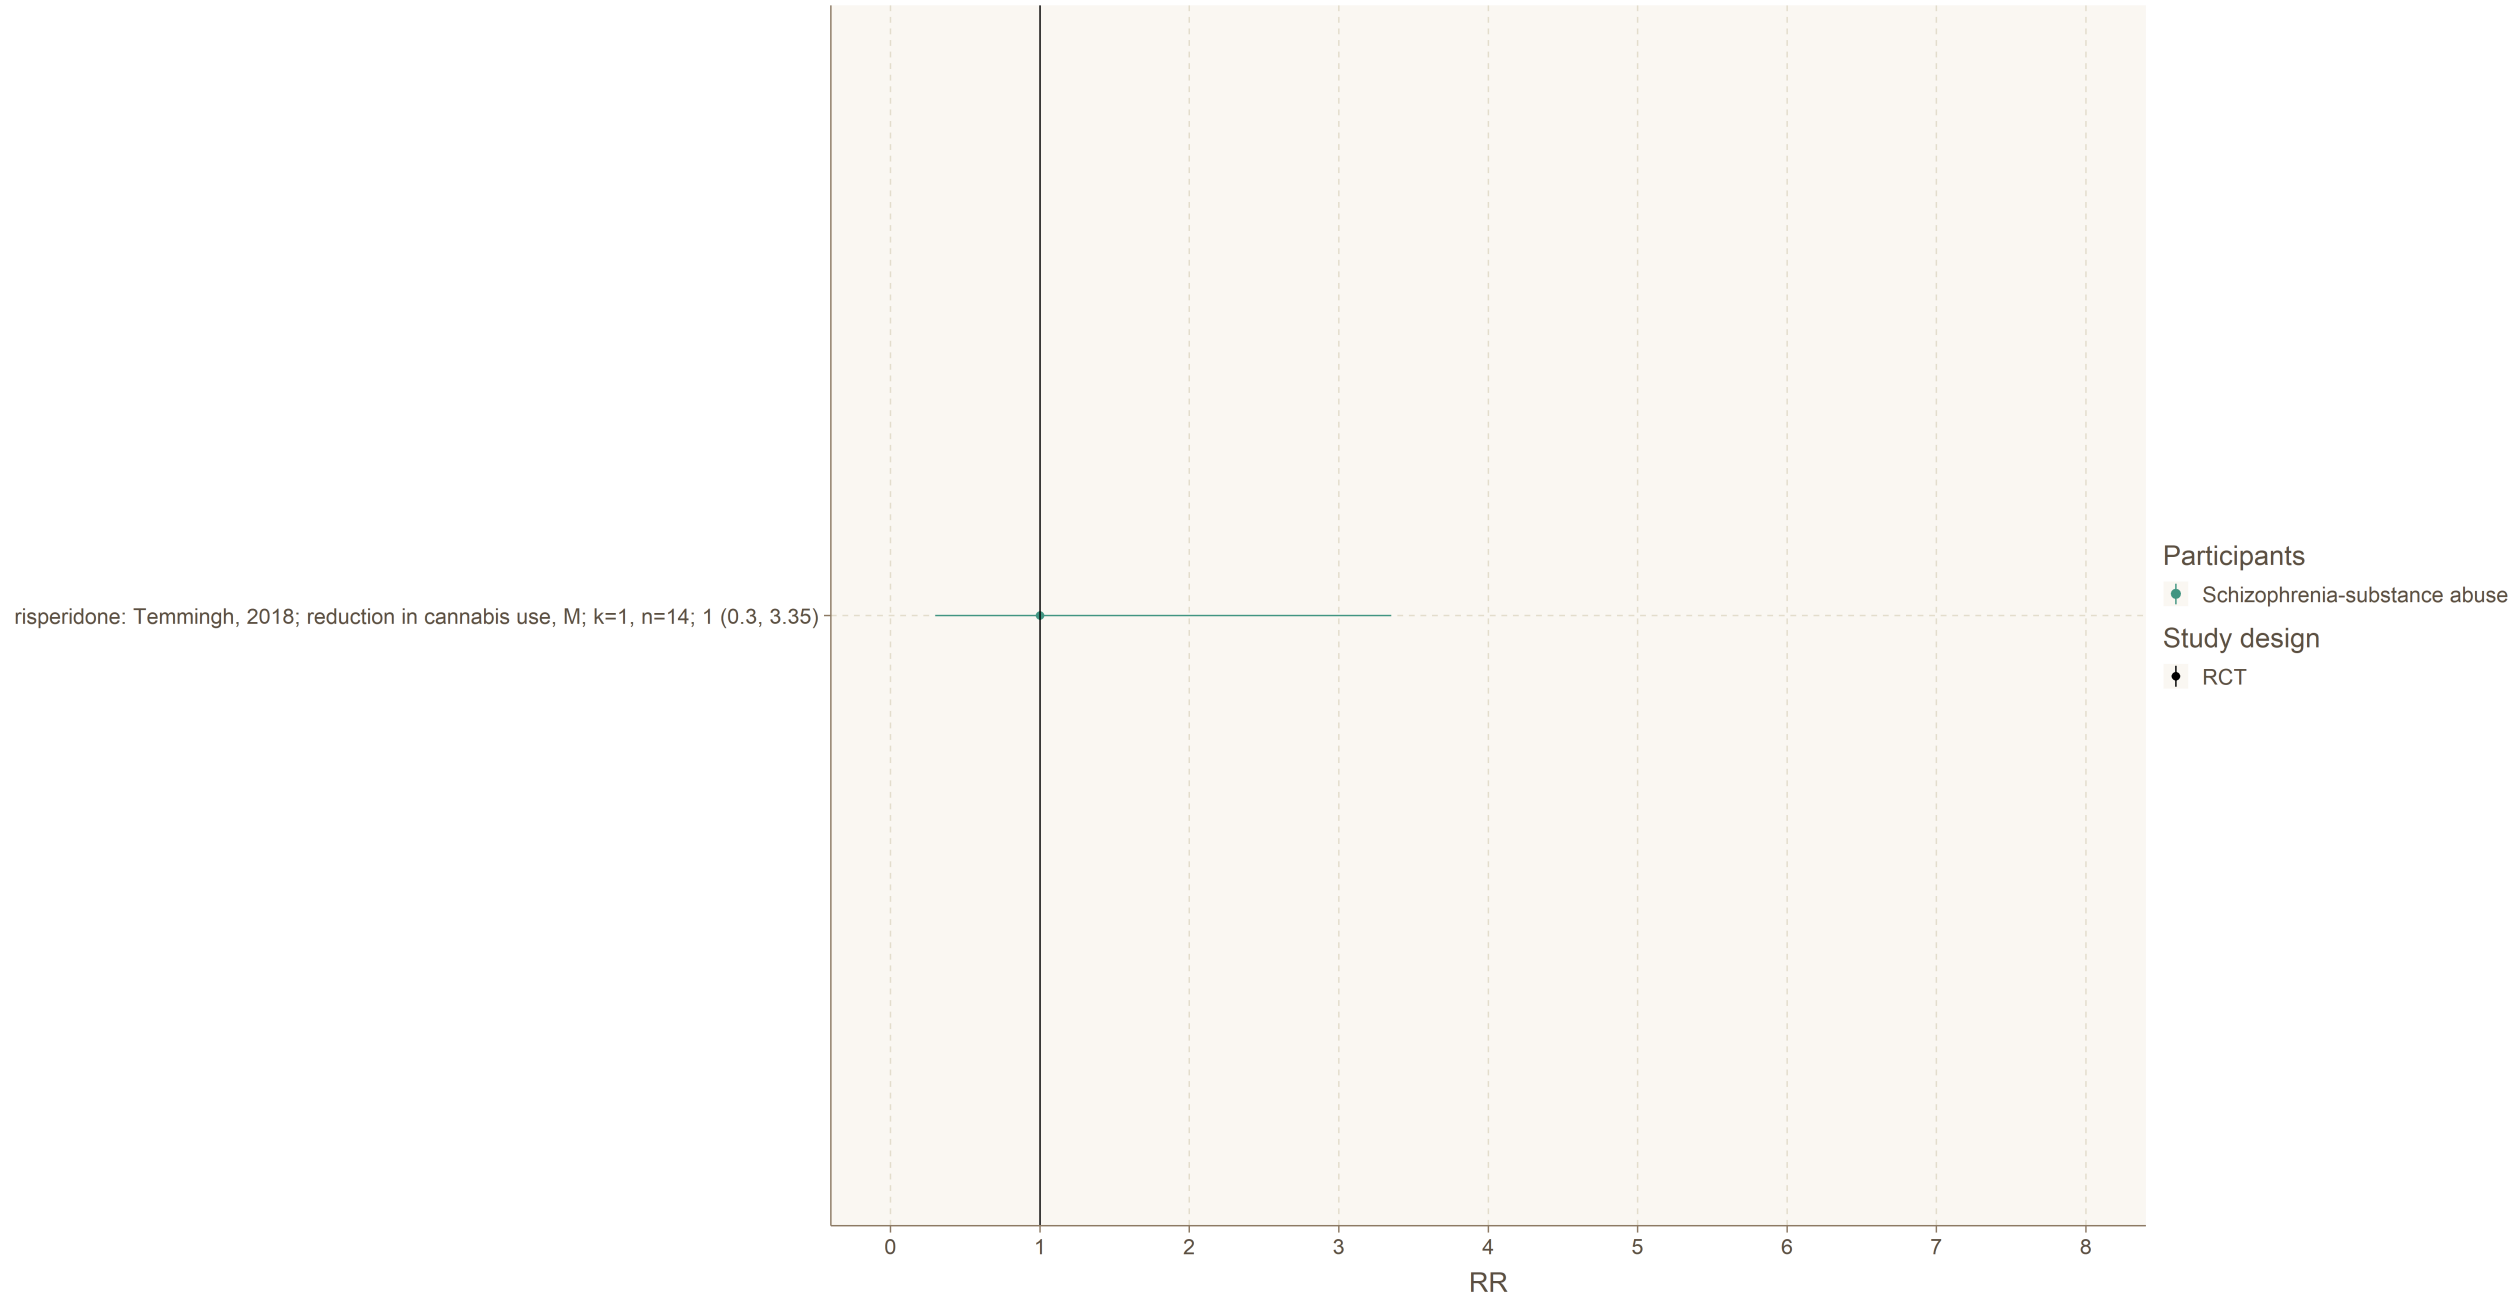

Participants  
Schizophrenia-substance abuse  
Study design  
RCT

### S 3 Other symptoms (cognition, self-injury) as dichotomous outcome

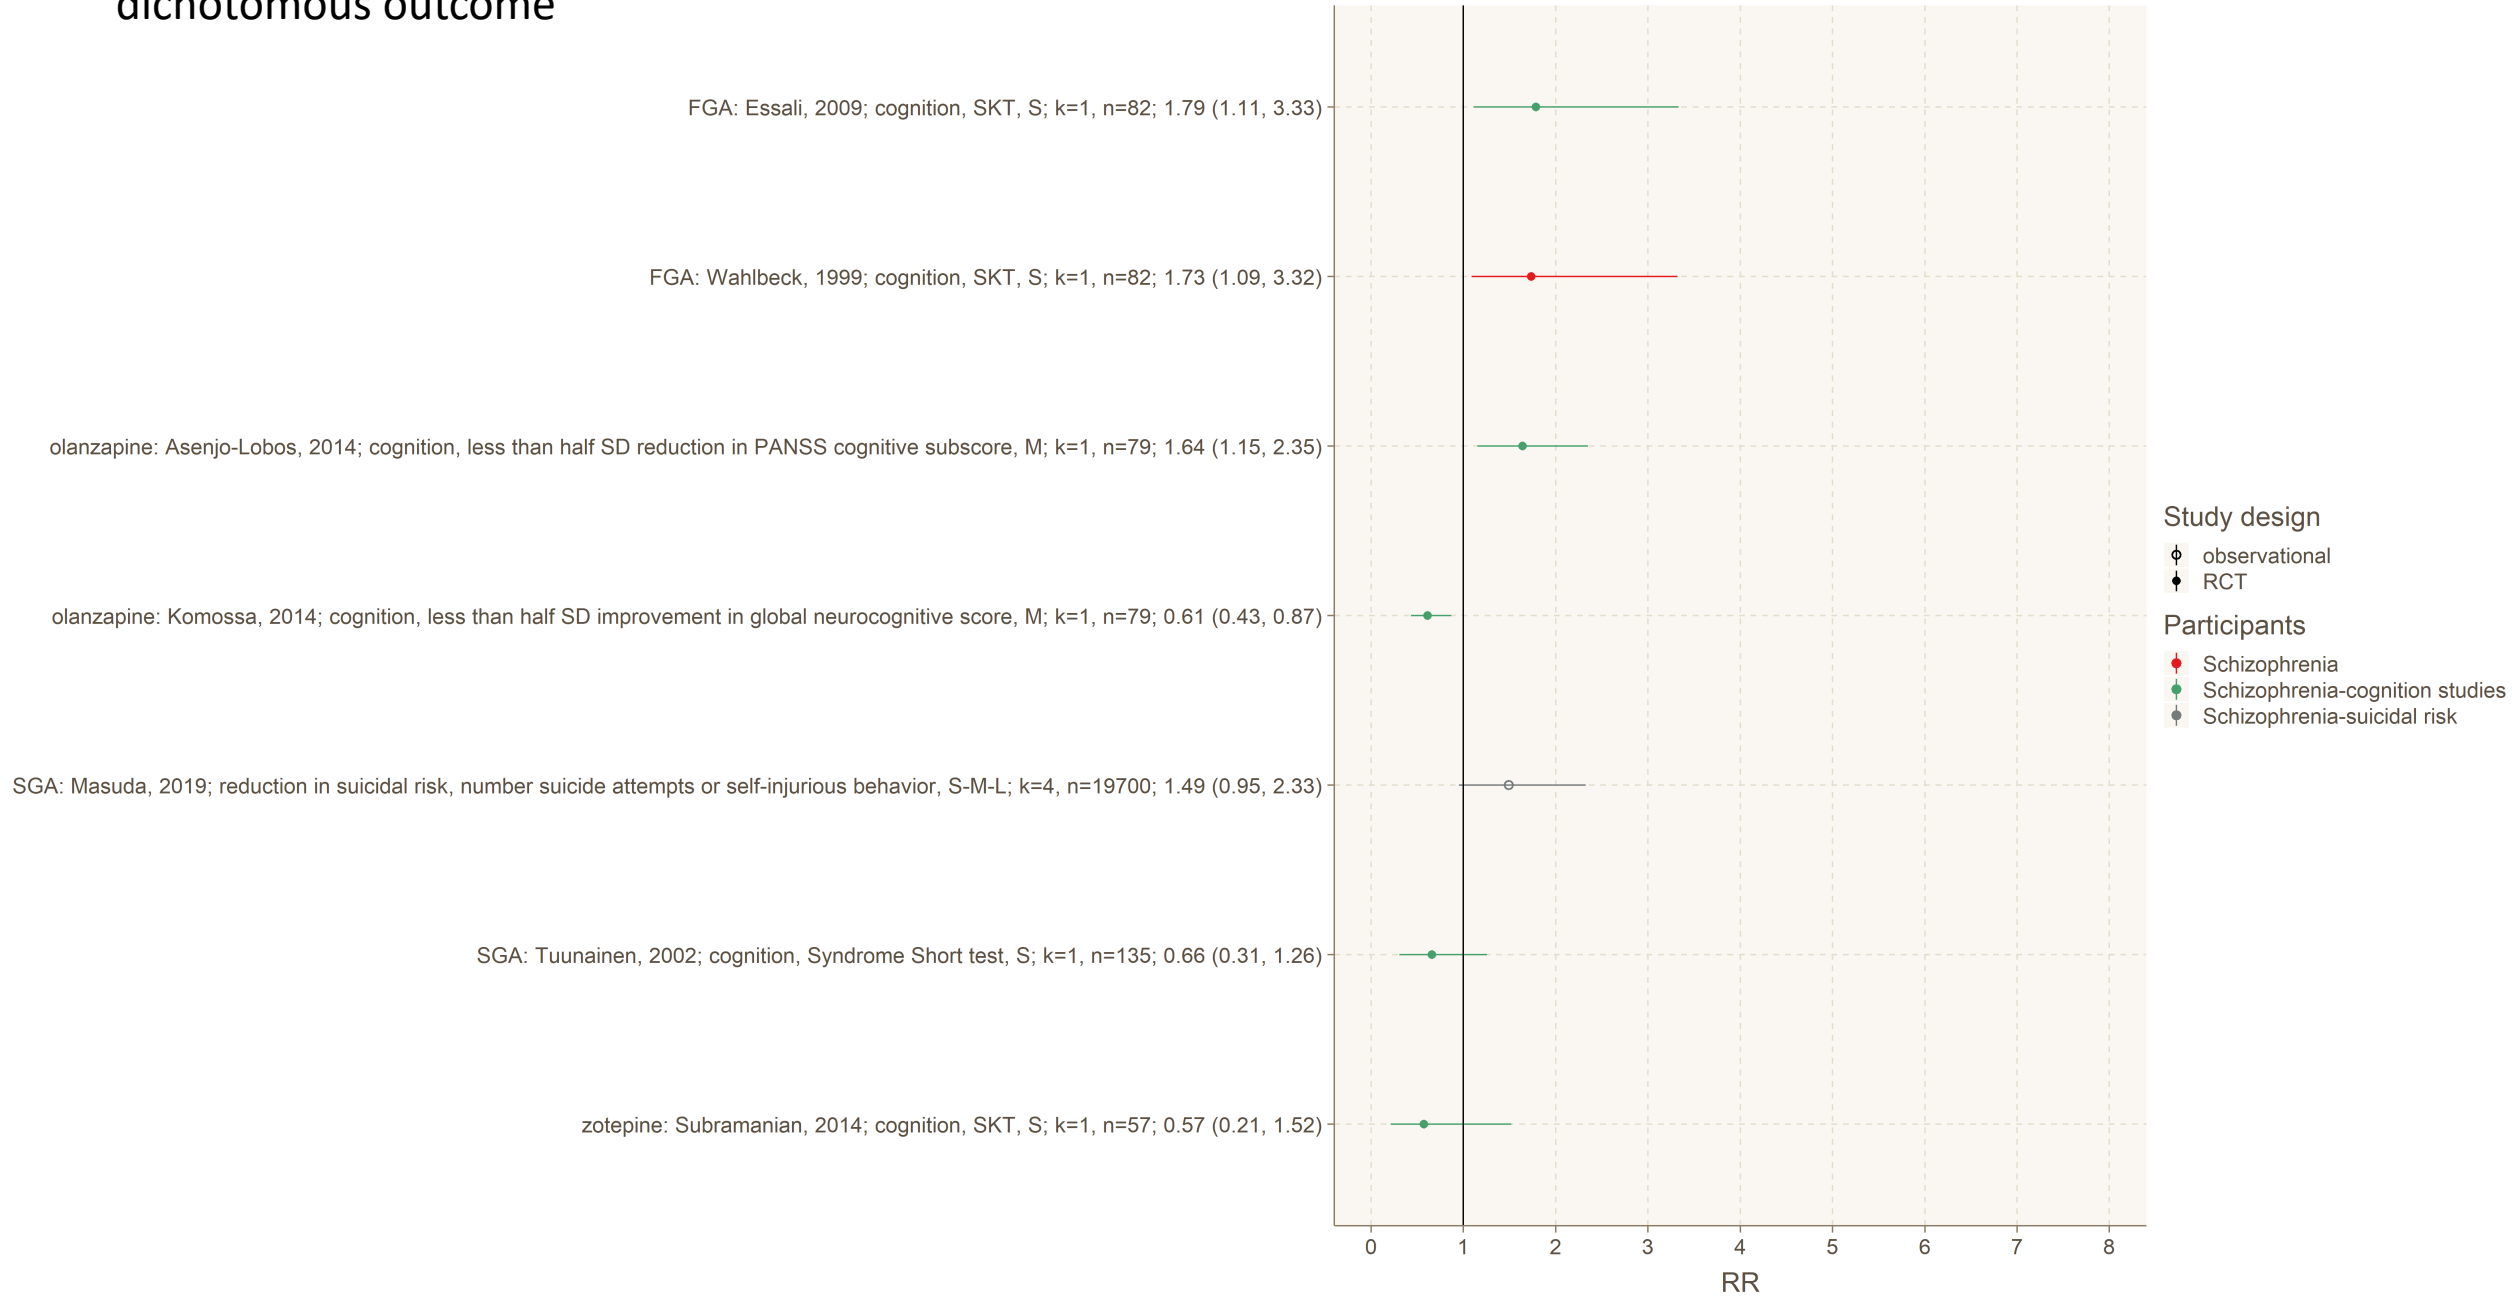

## S 4 Needing additional medication as dichotomous outcome

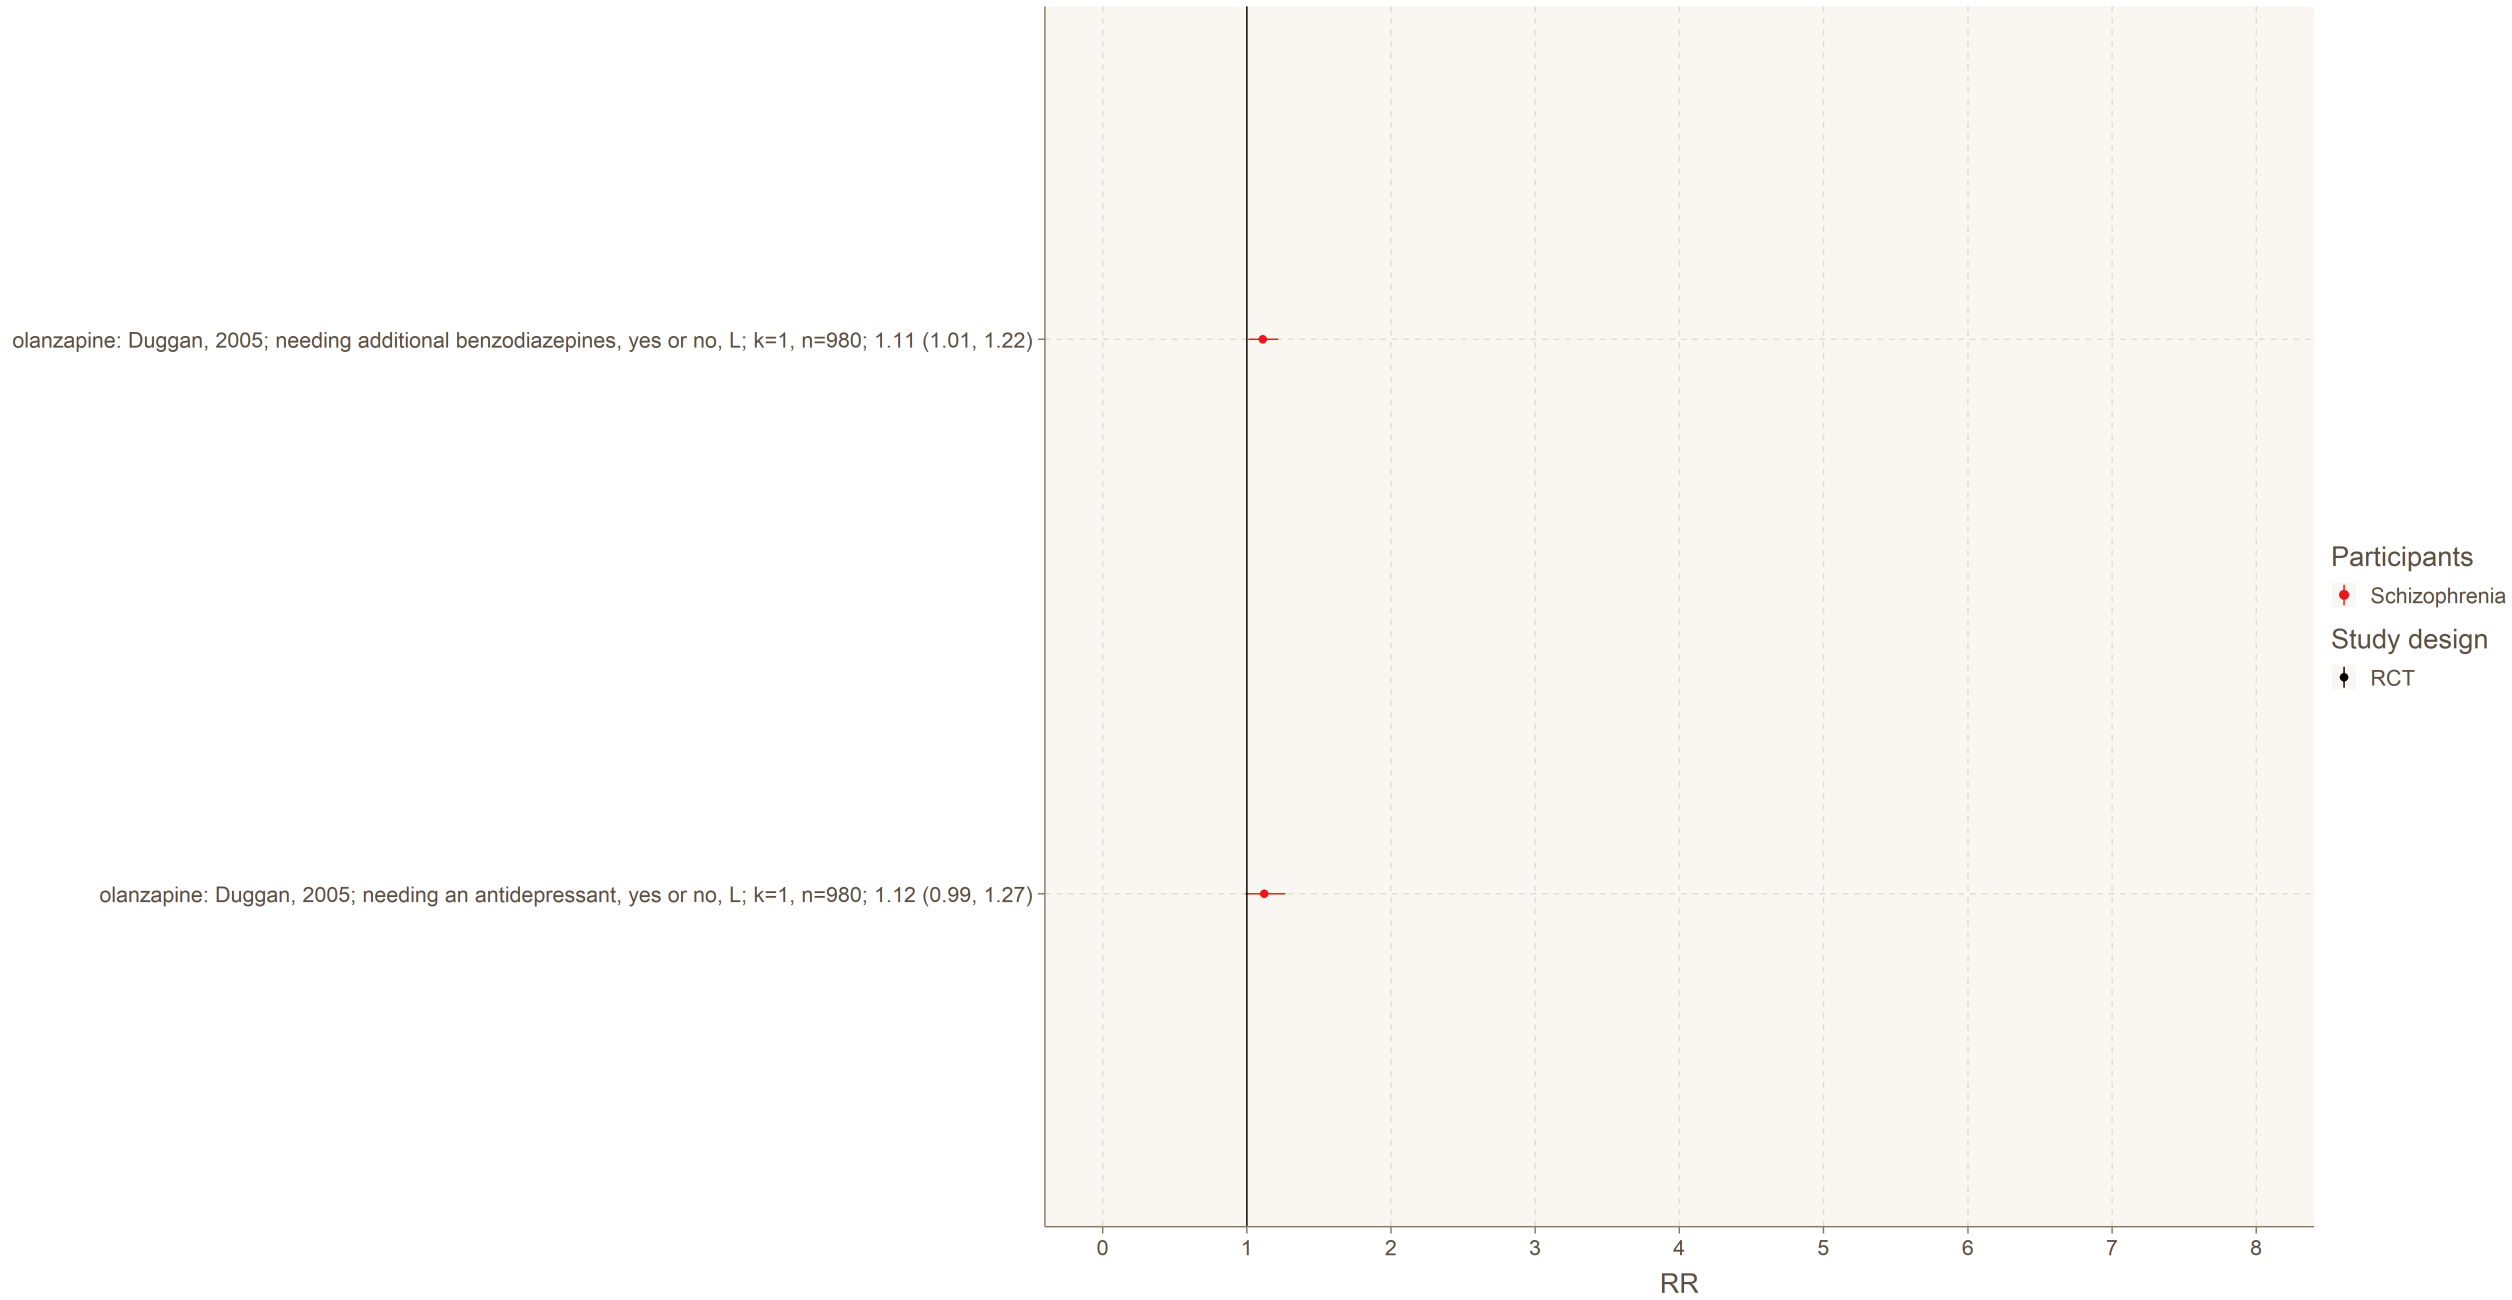

# S 5 Blood pressure as continuous outcome

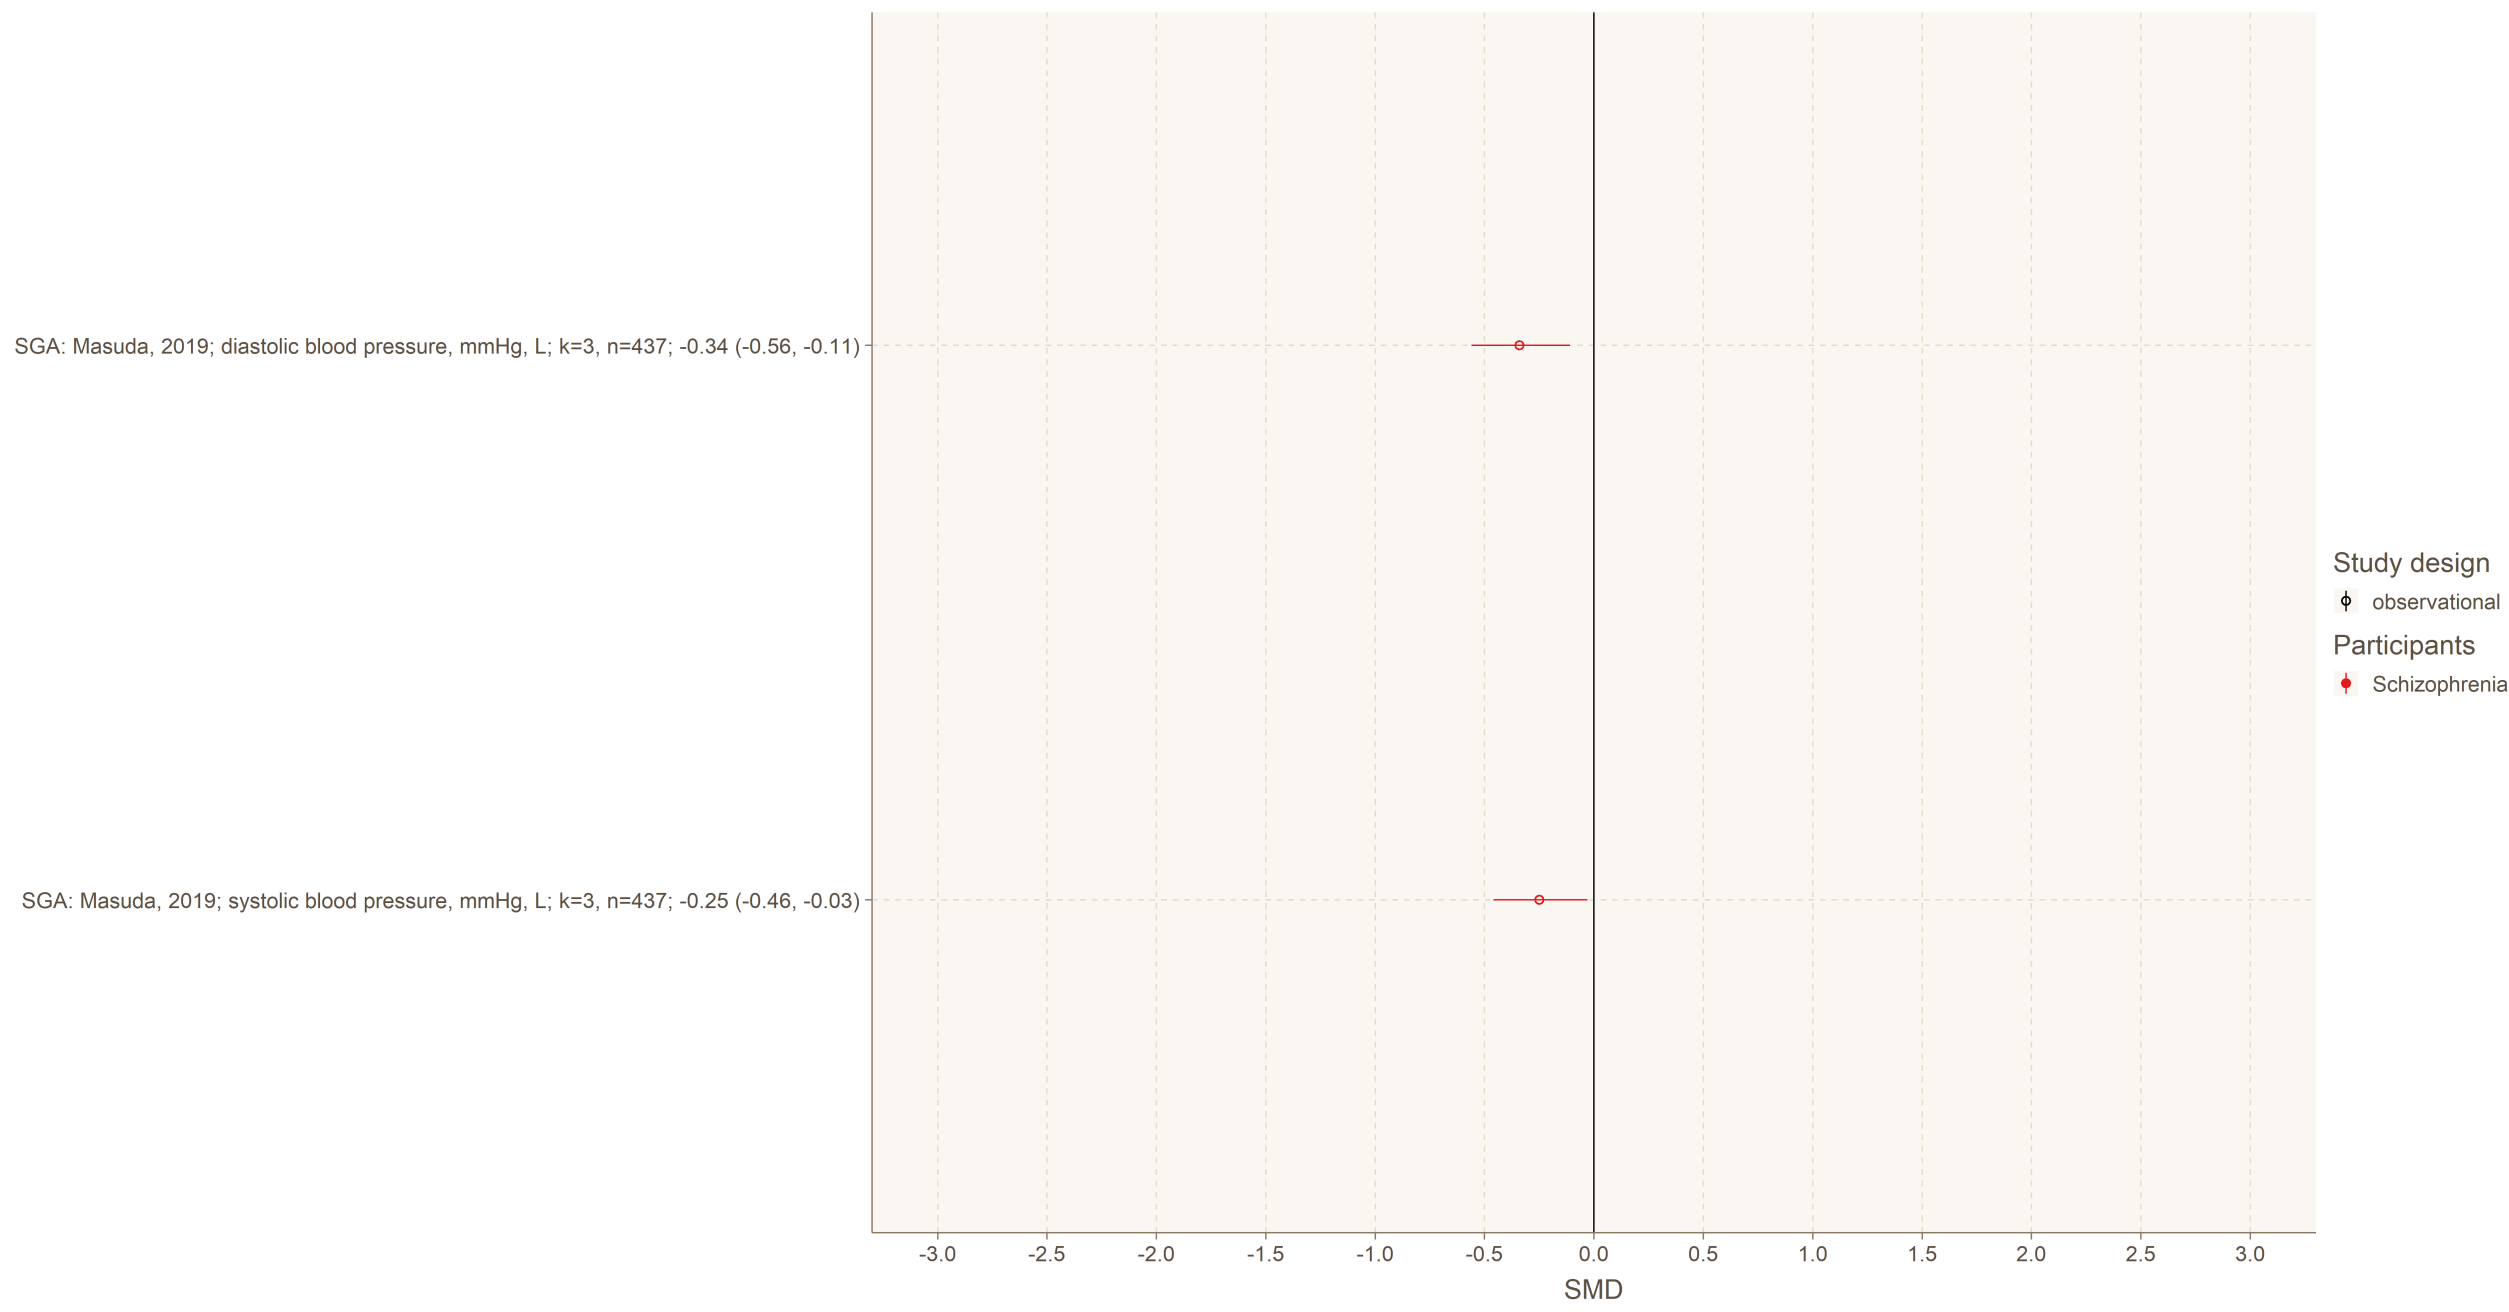

# S 6 Cognitive side effects as continuous outcome

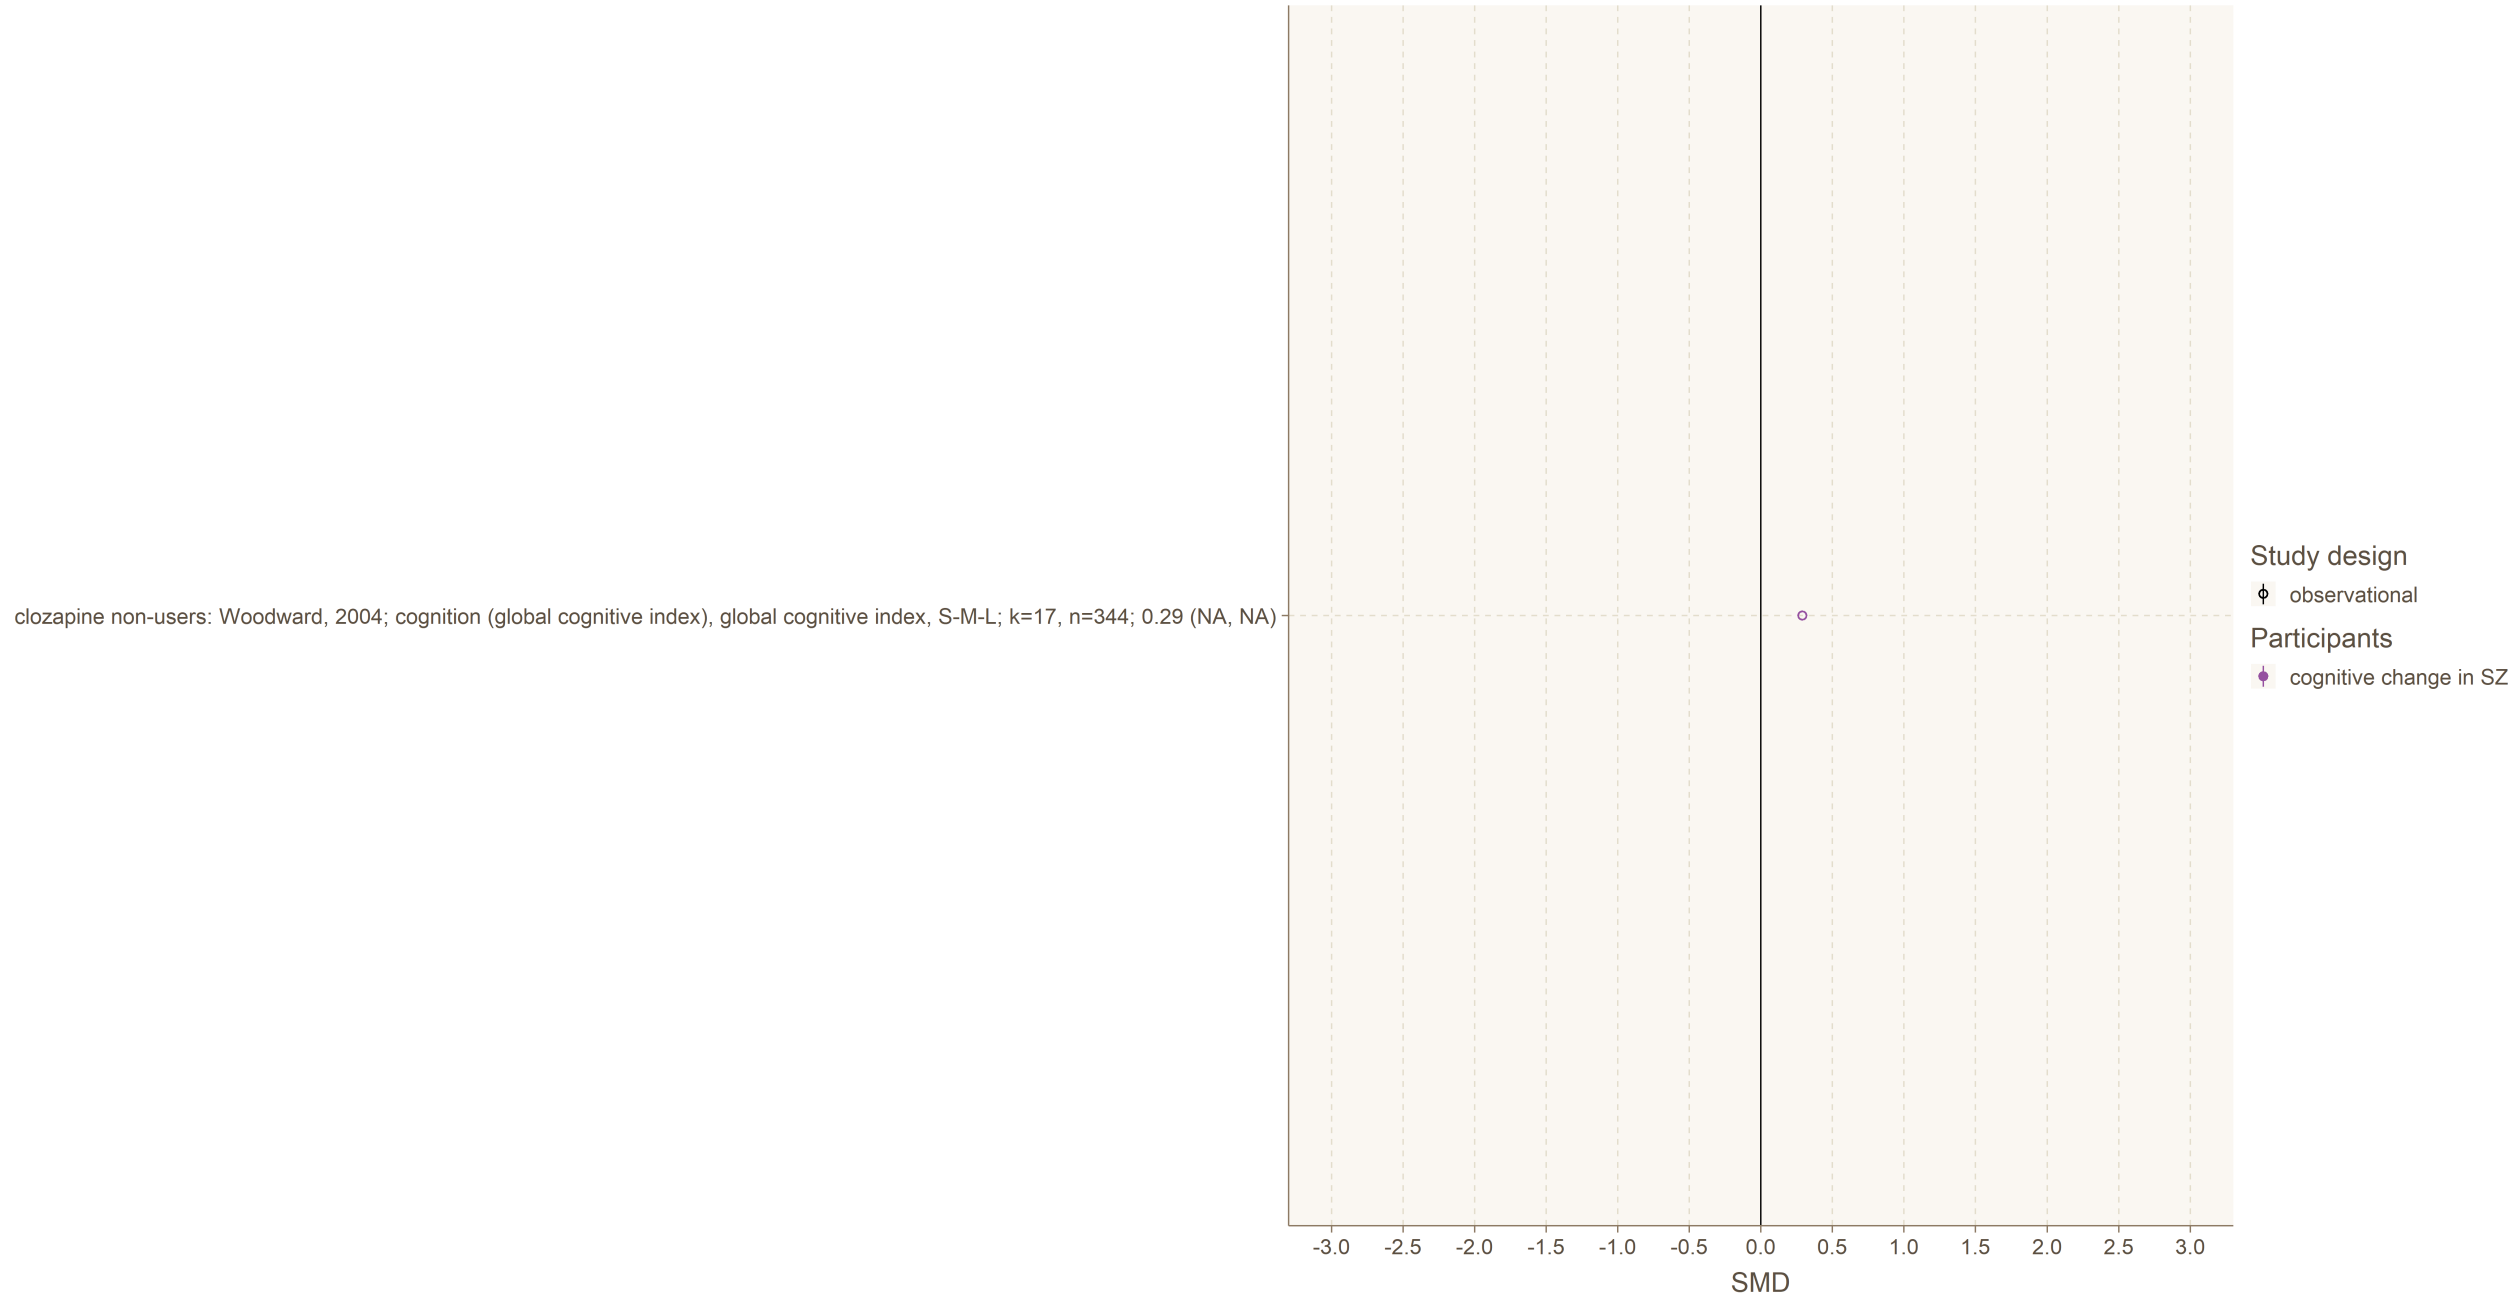

# S 7 Prolactin levels as continuous outcome

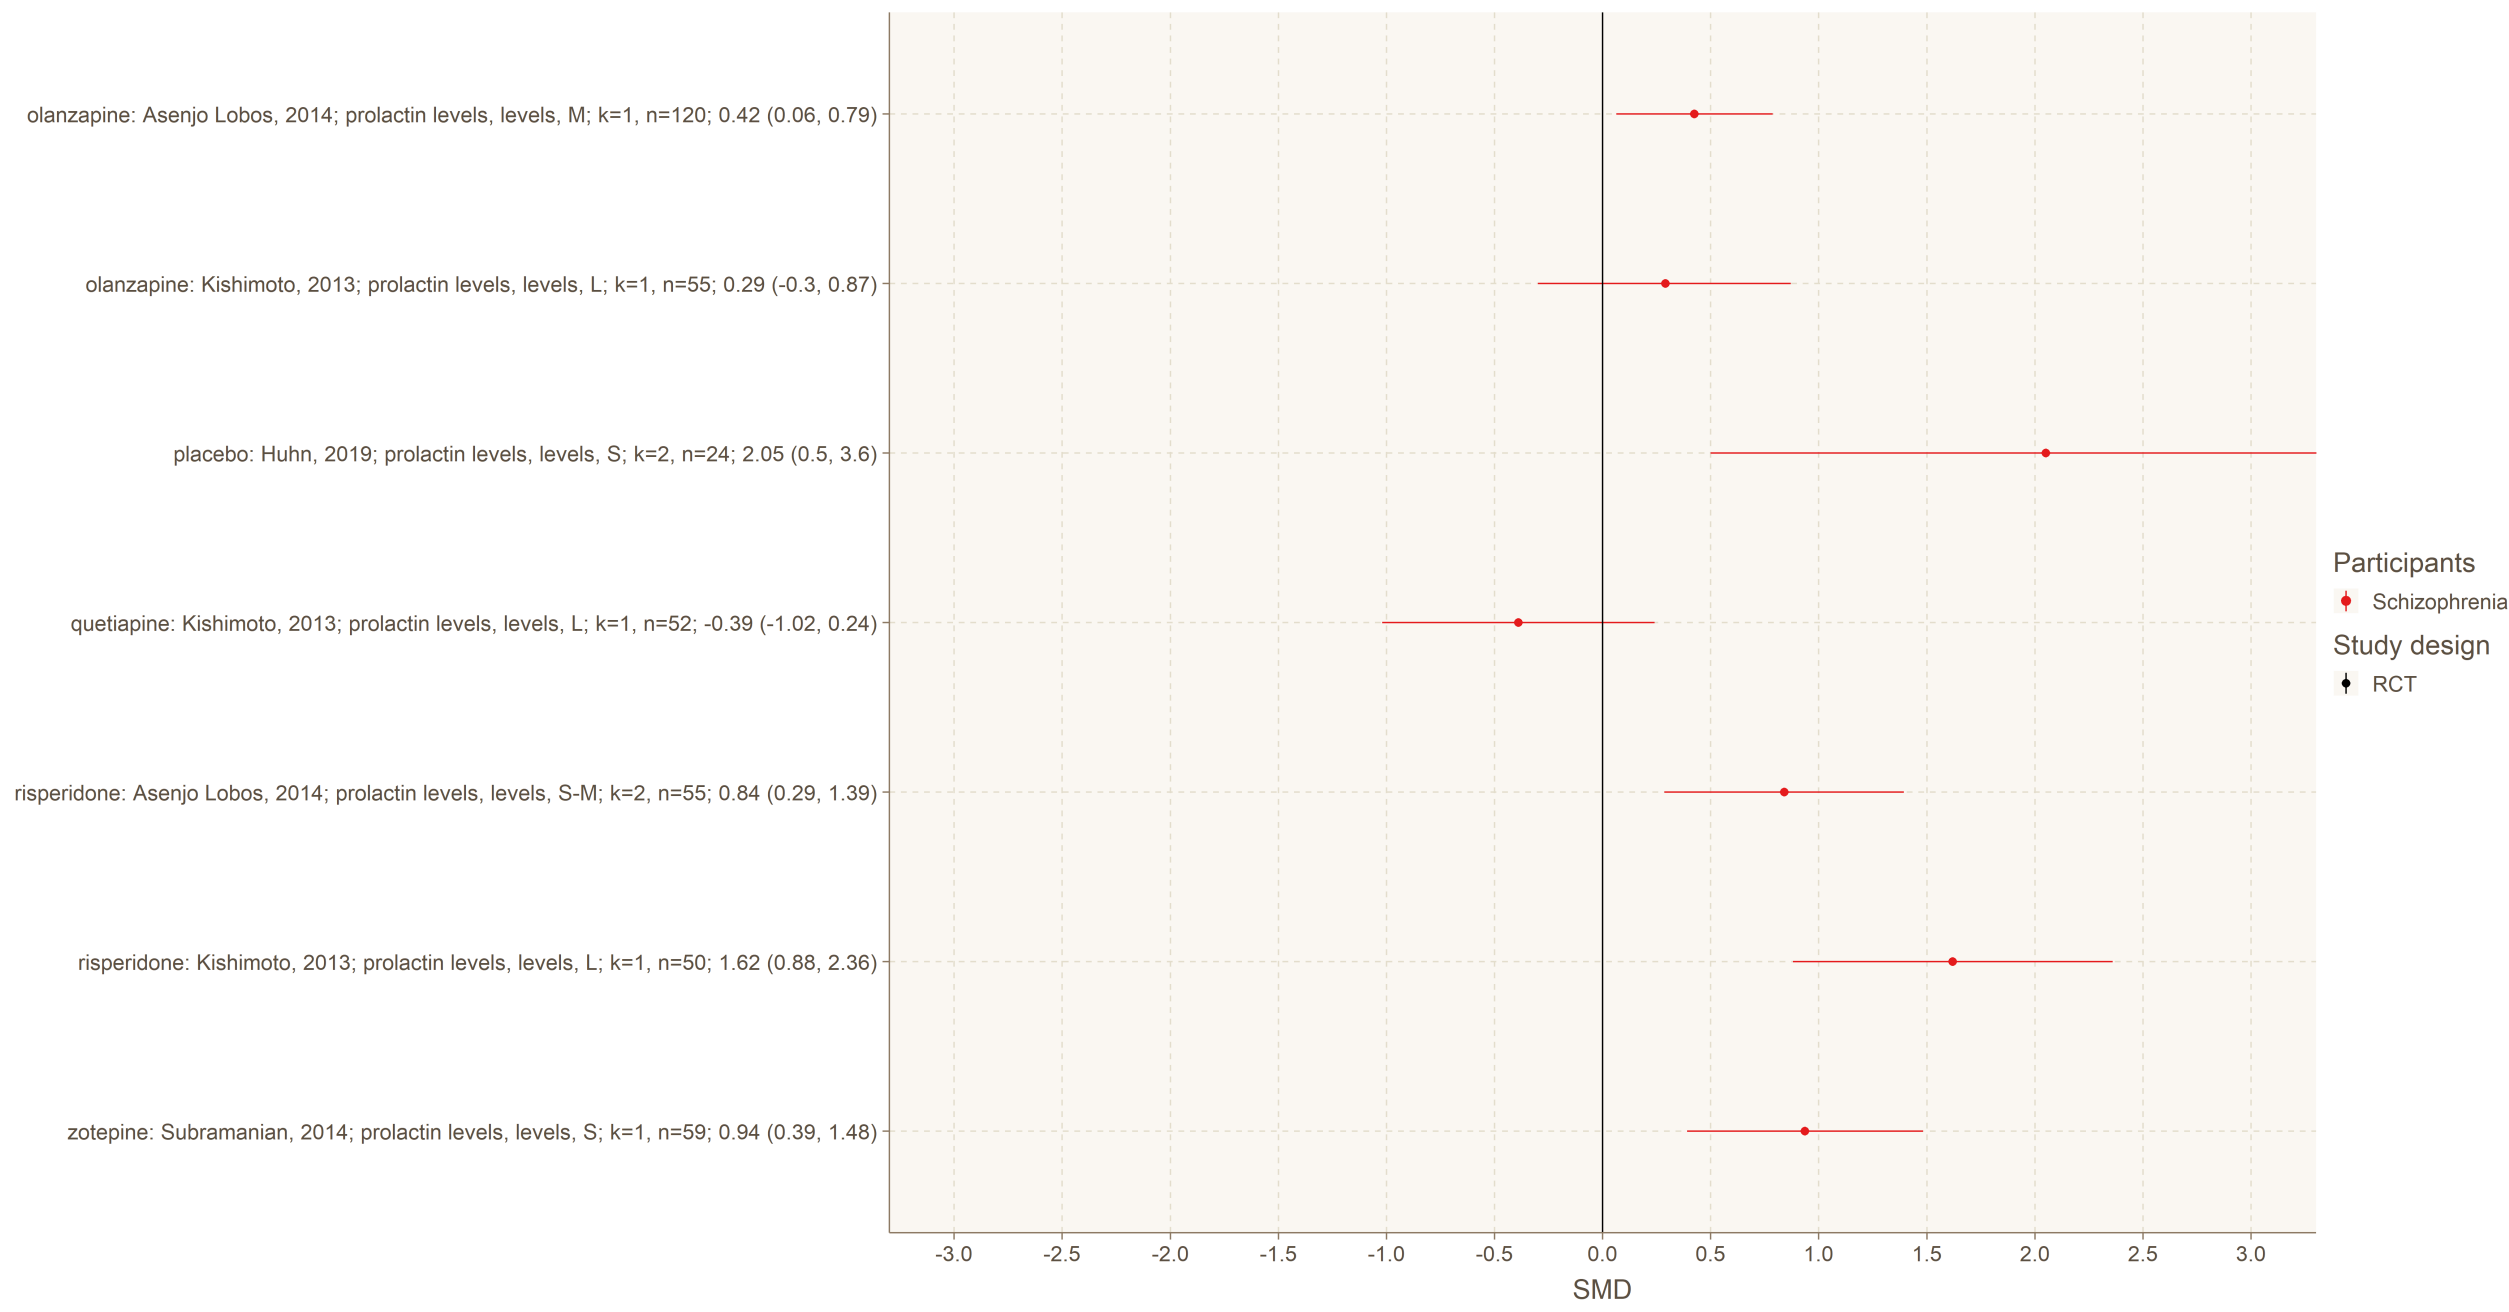

# S 8 Motor function as continuous outcome

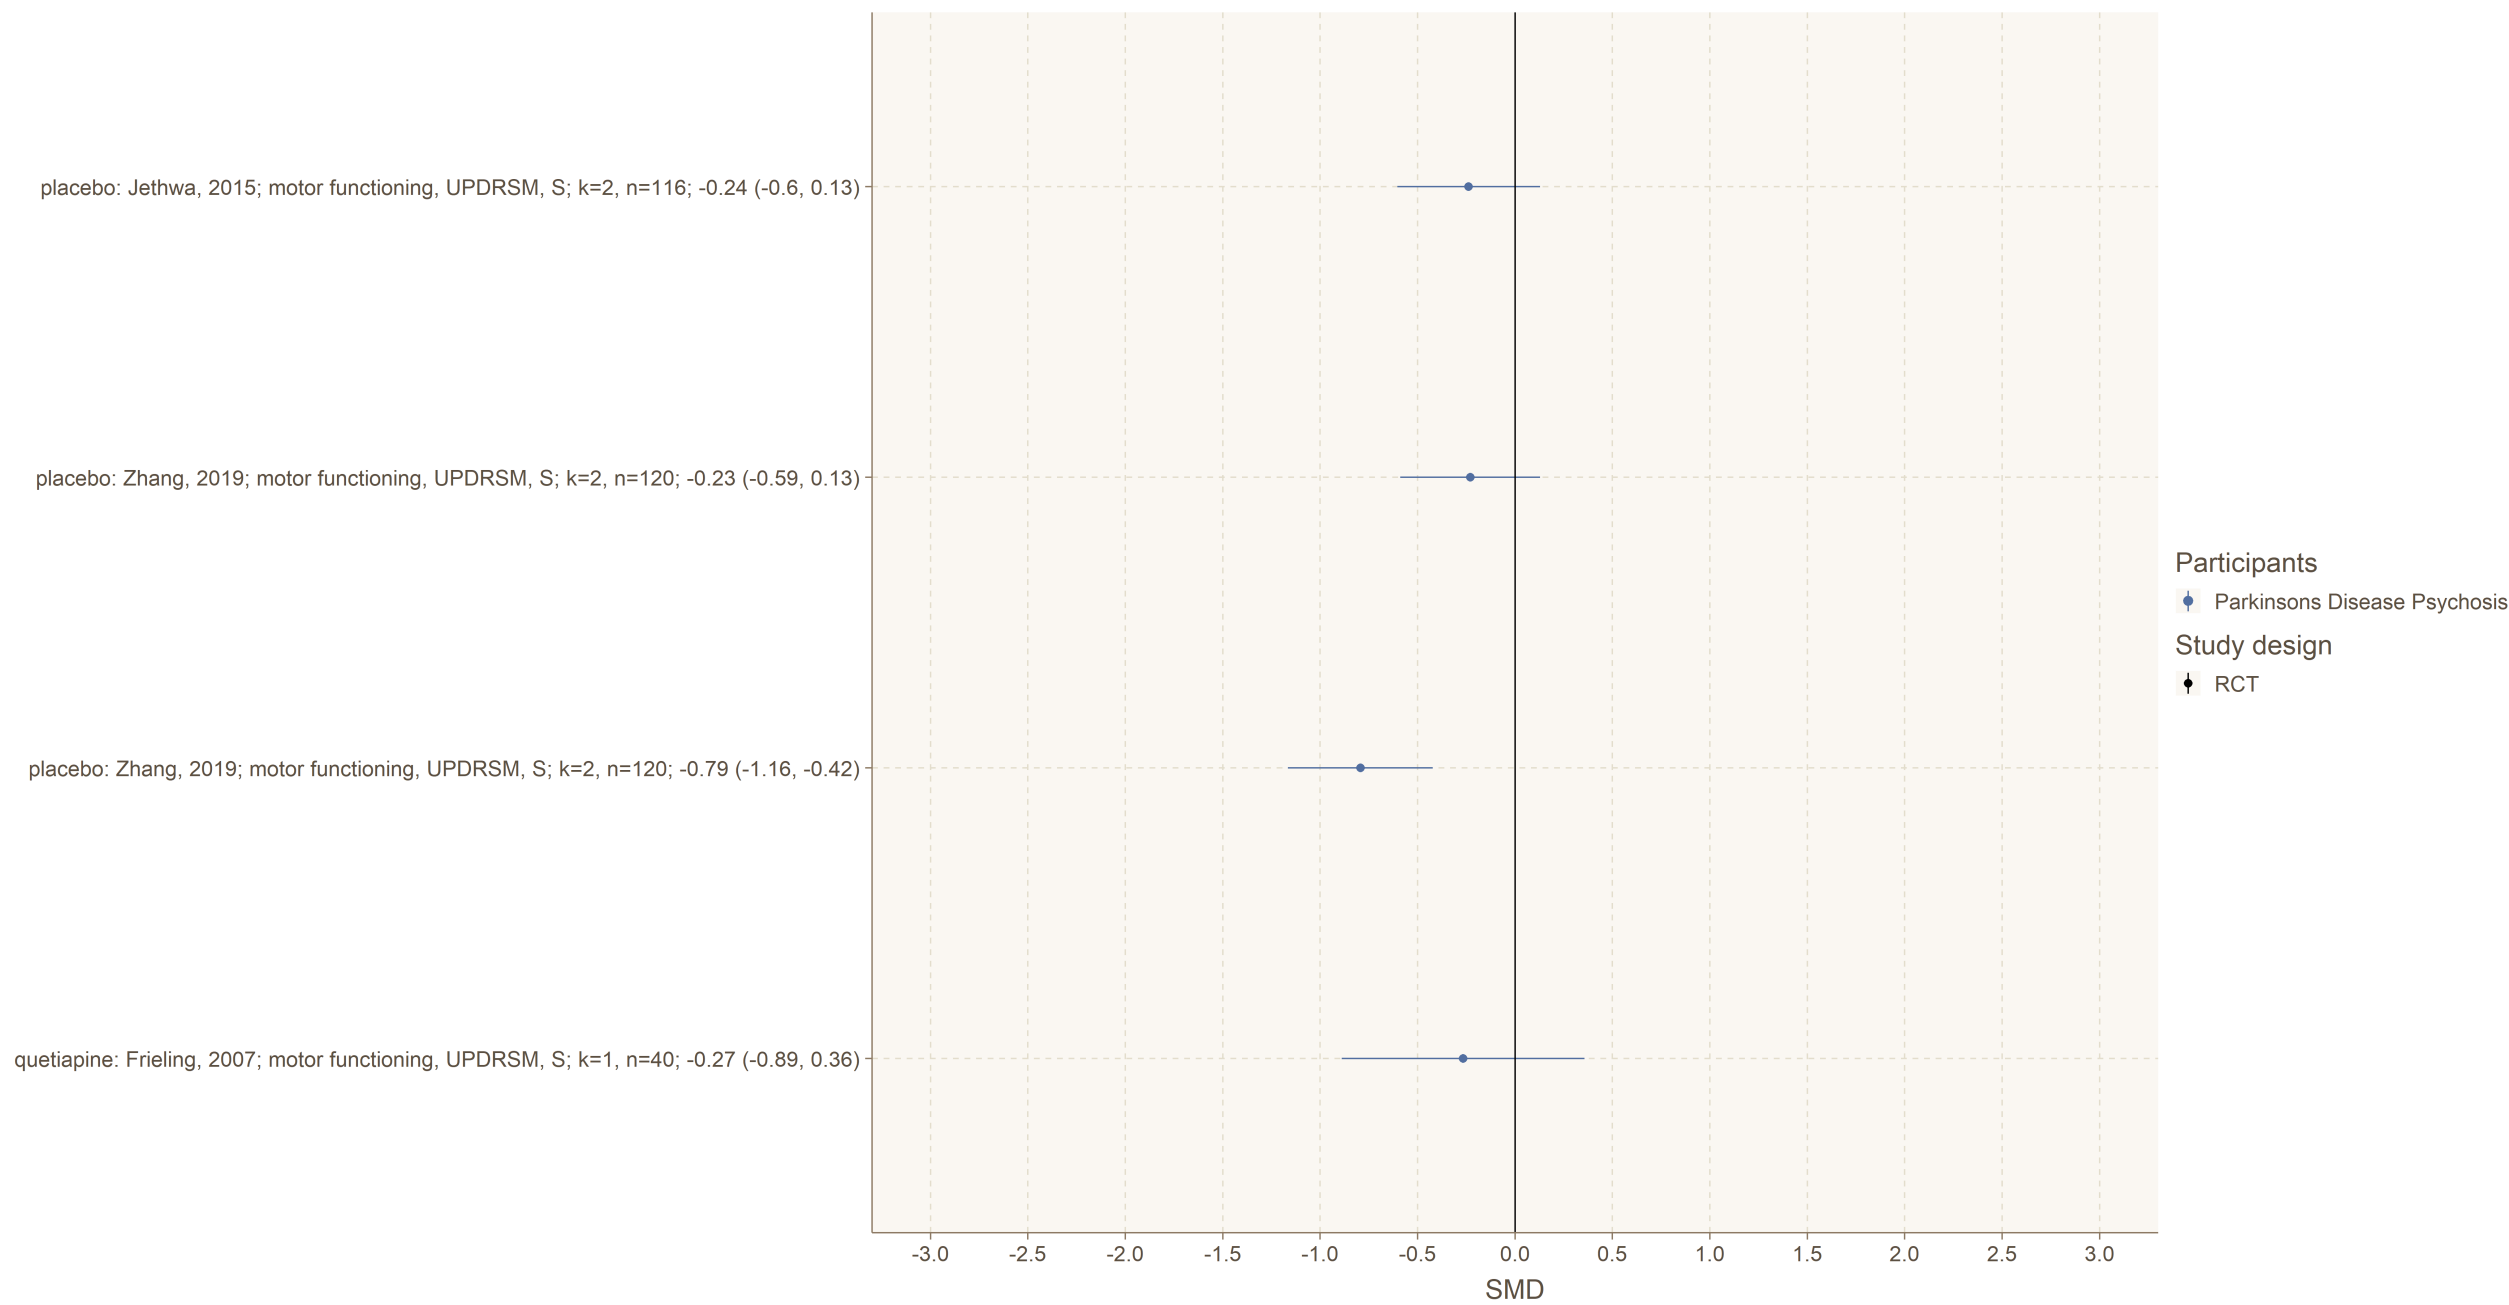



# S 9 Diabetes as dichotomous outcome

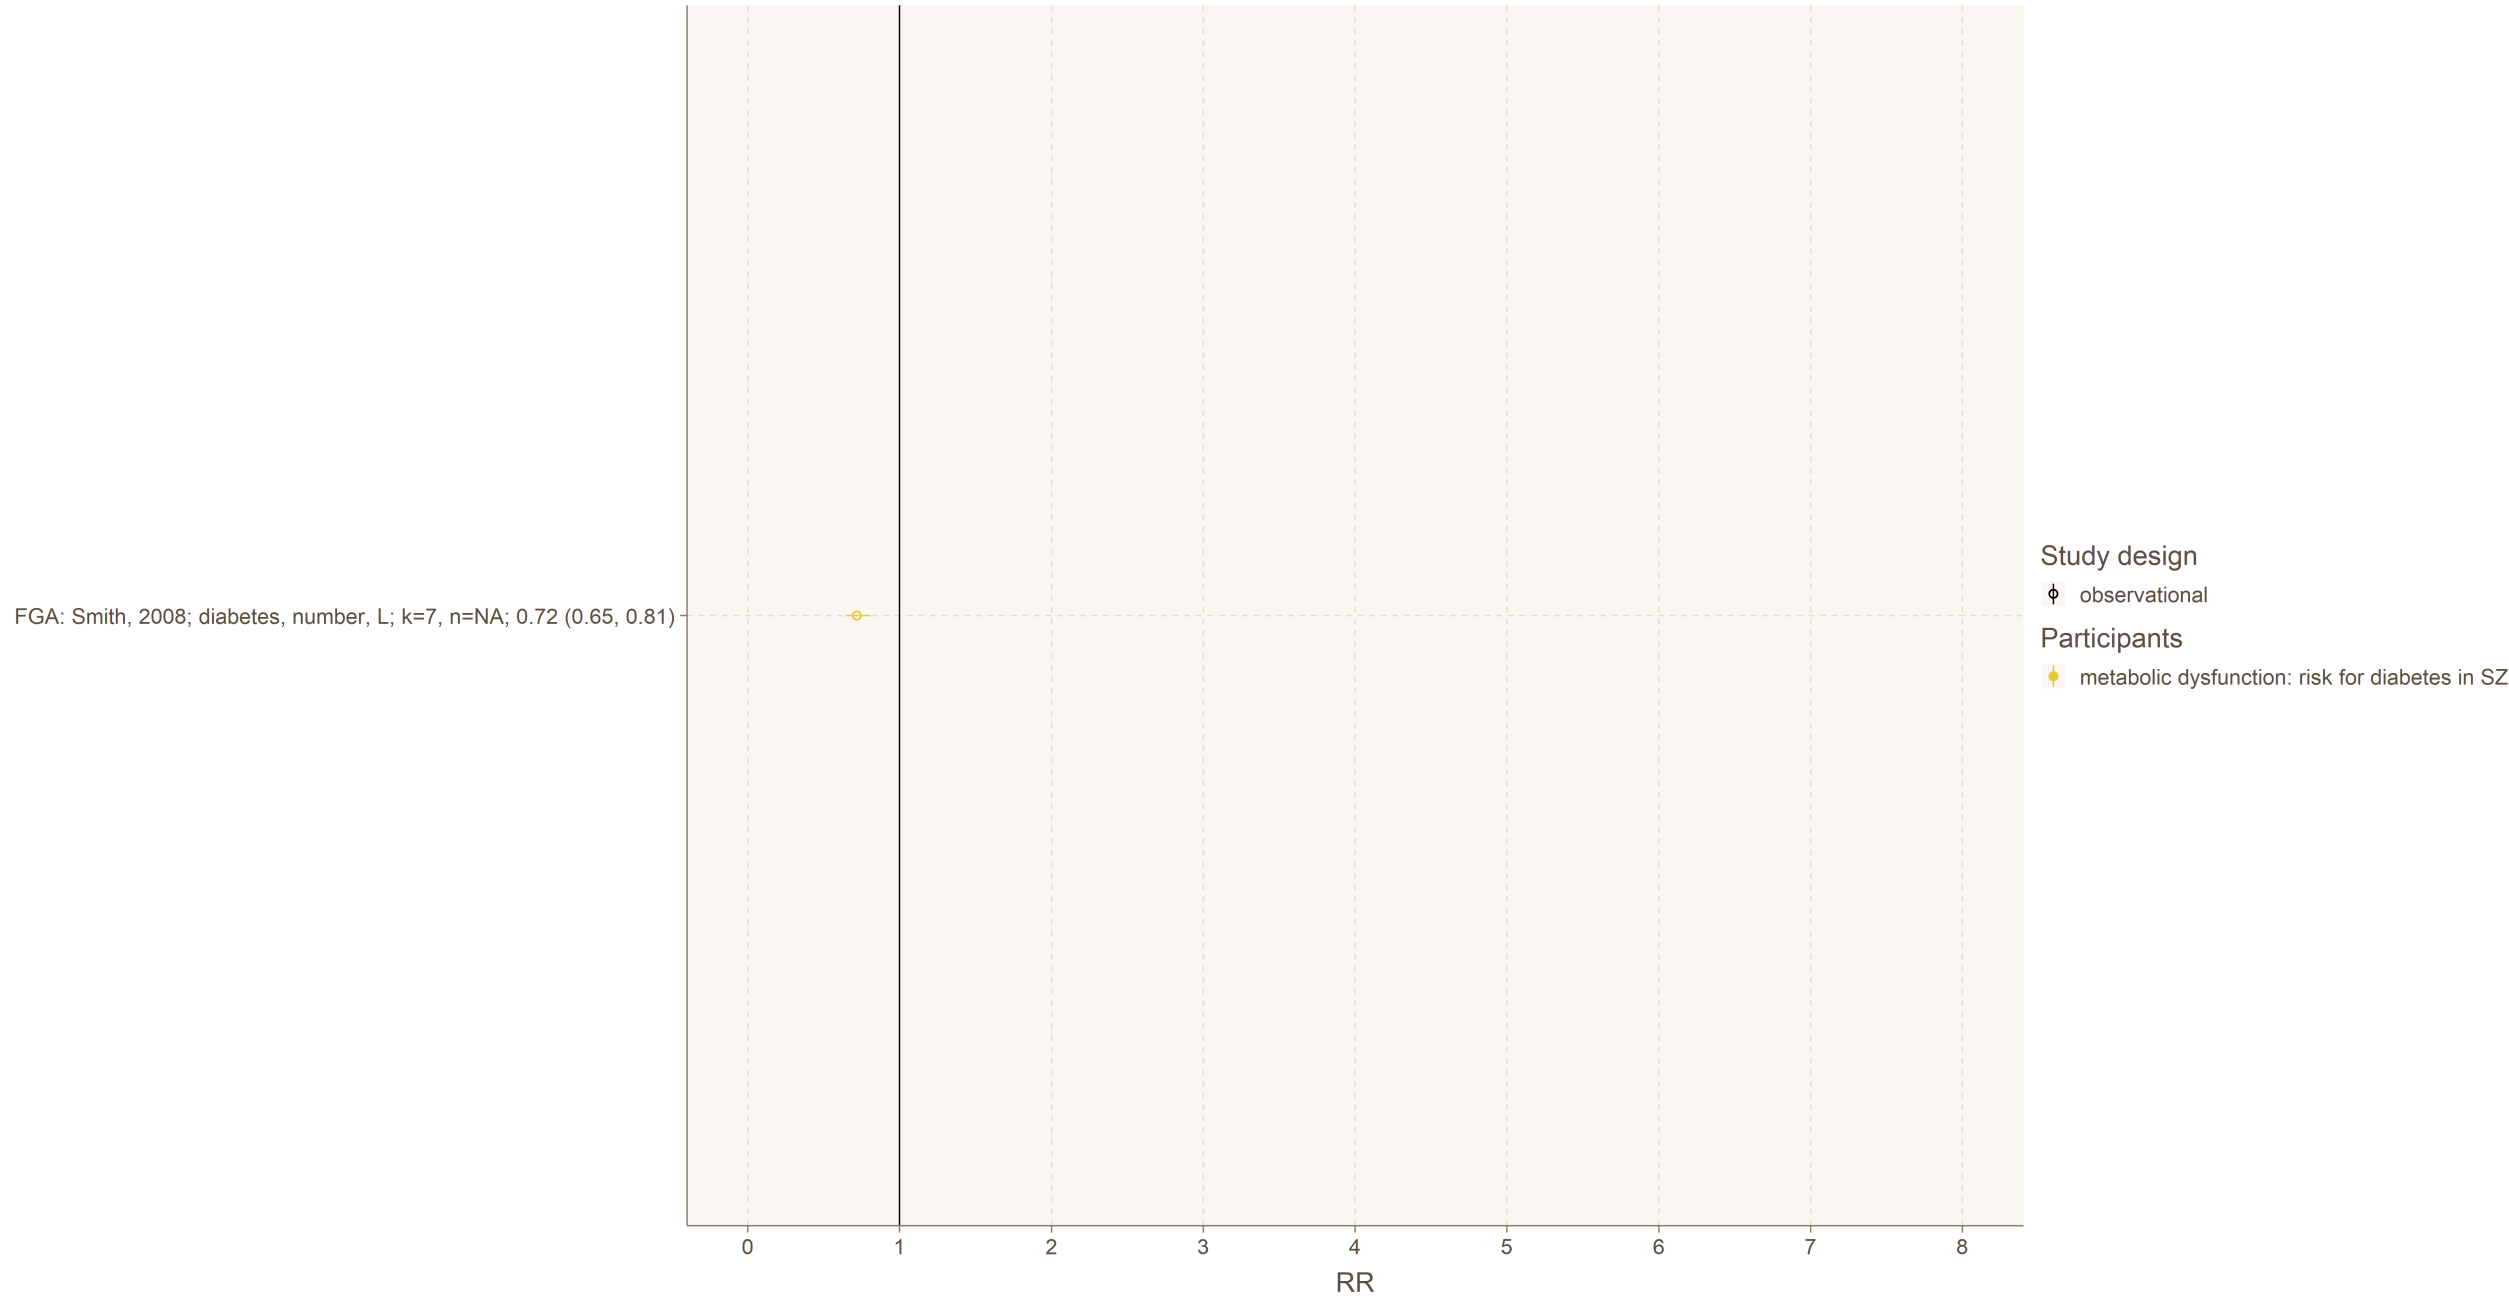

# S 10 High temperature as dichotomous outcome

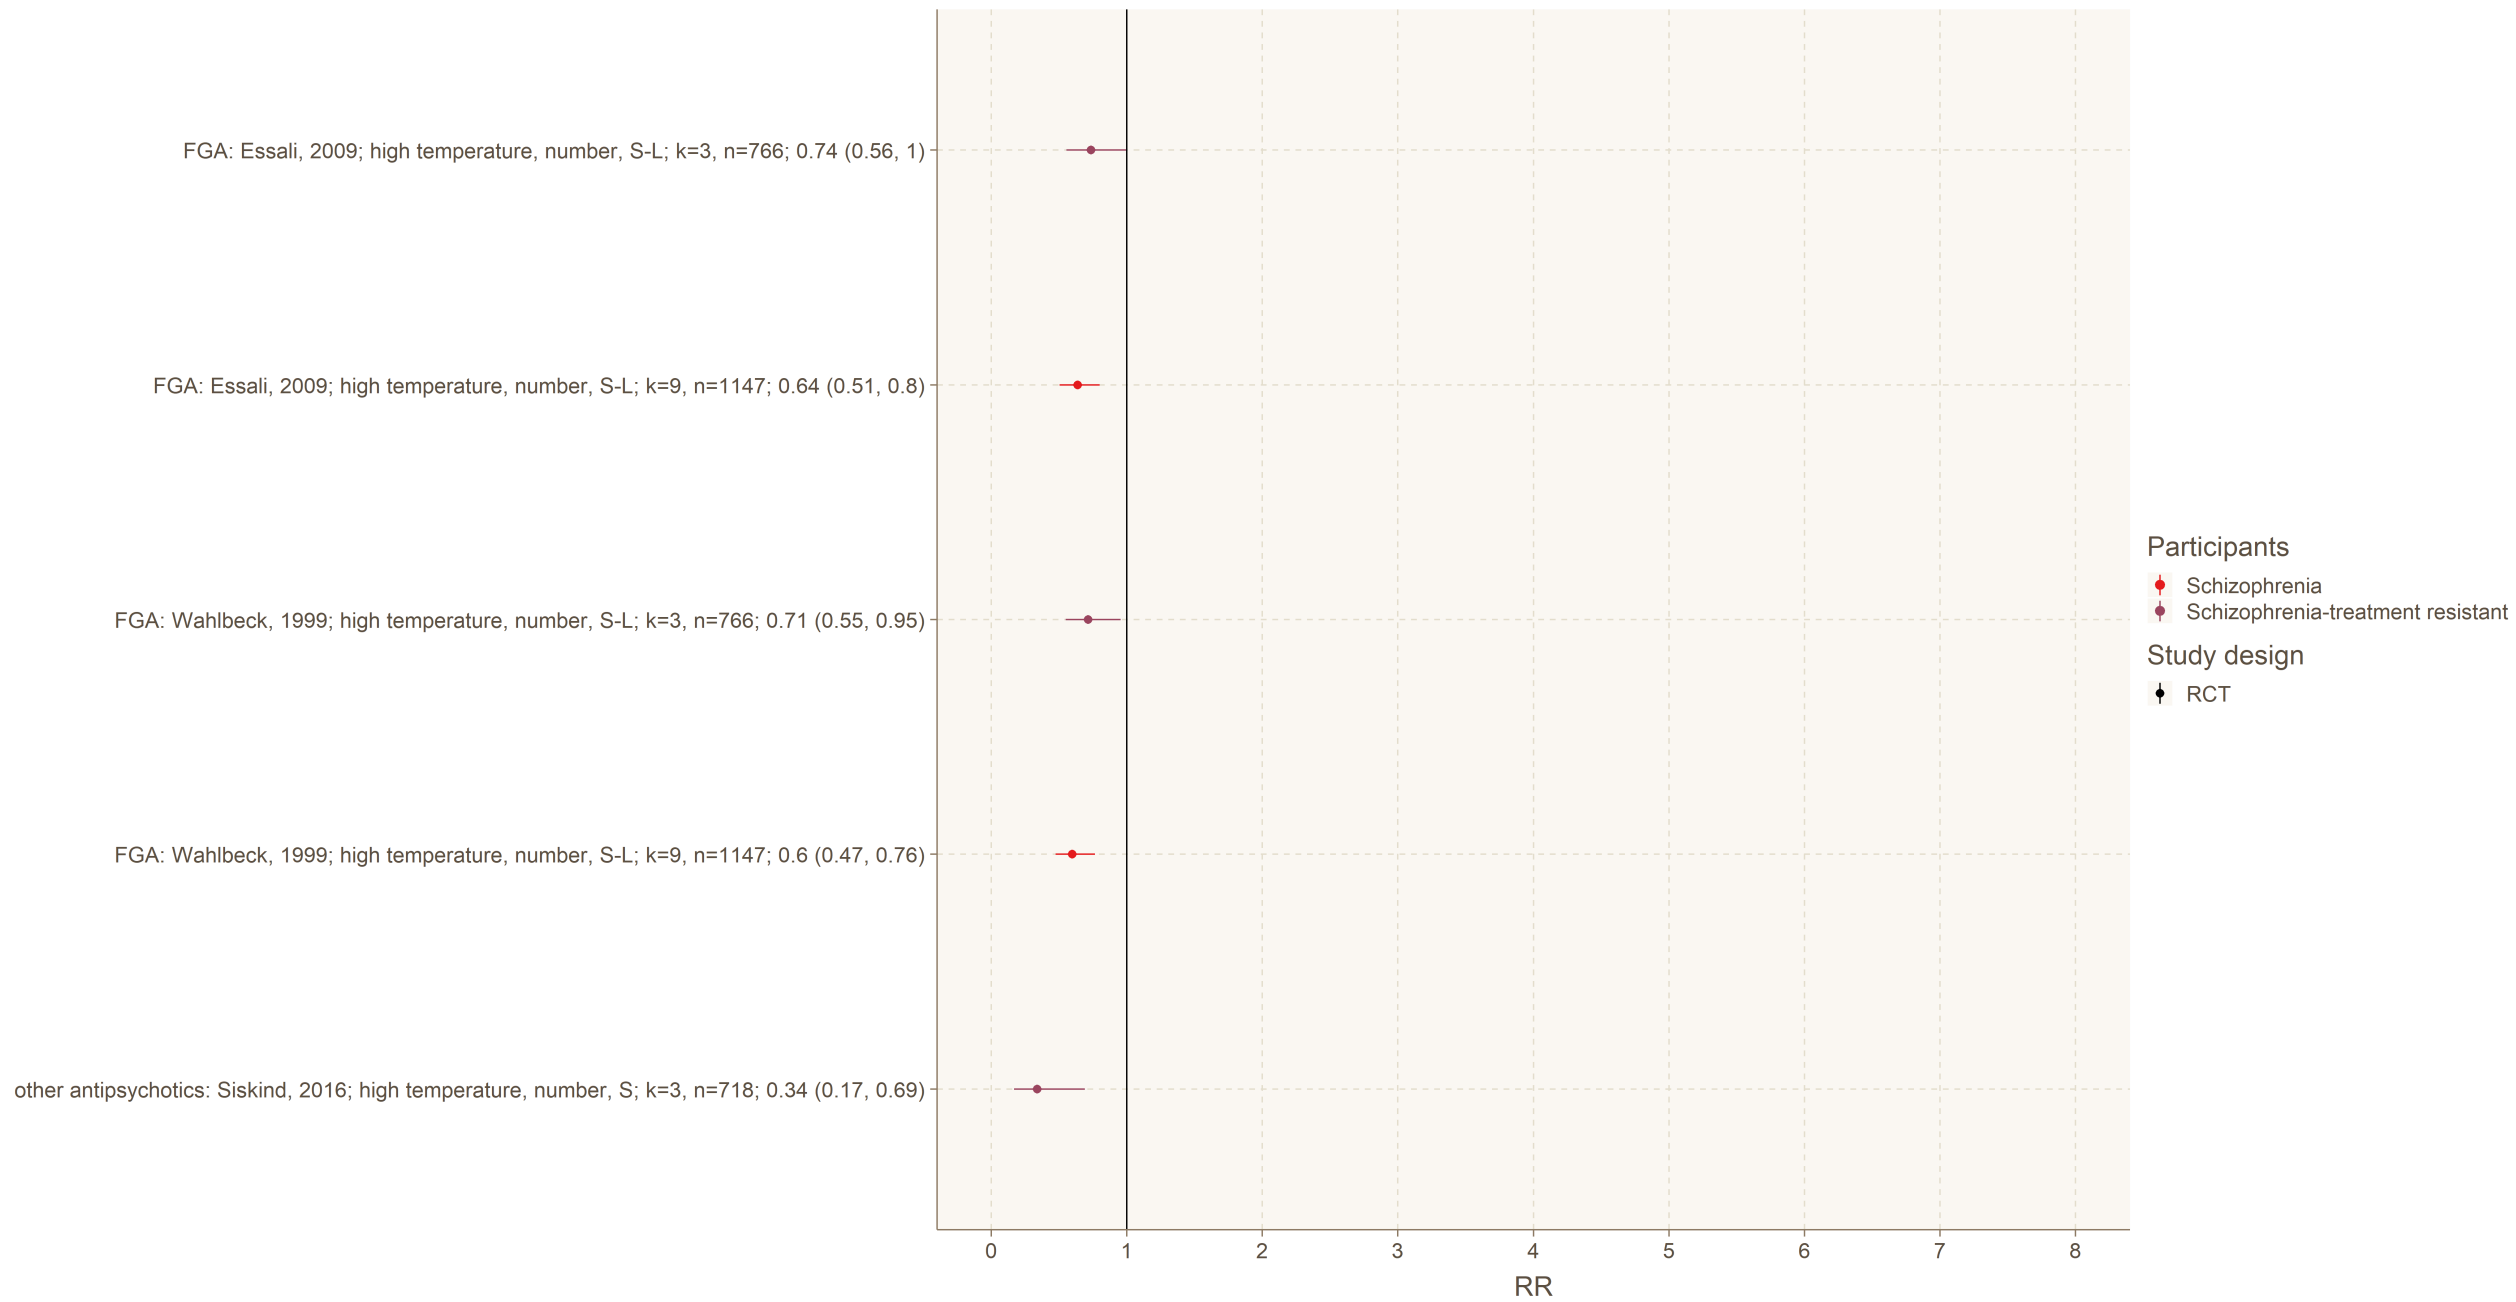

# S 11 Occupation as dichotomous outcome

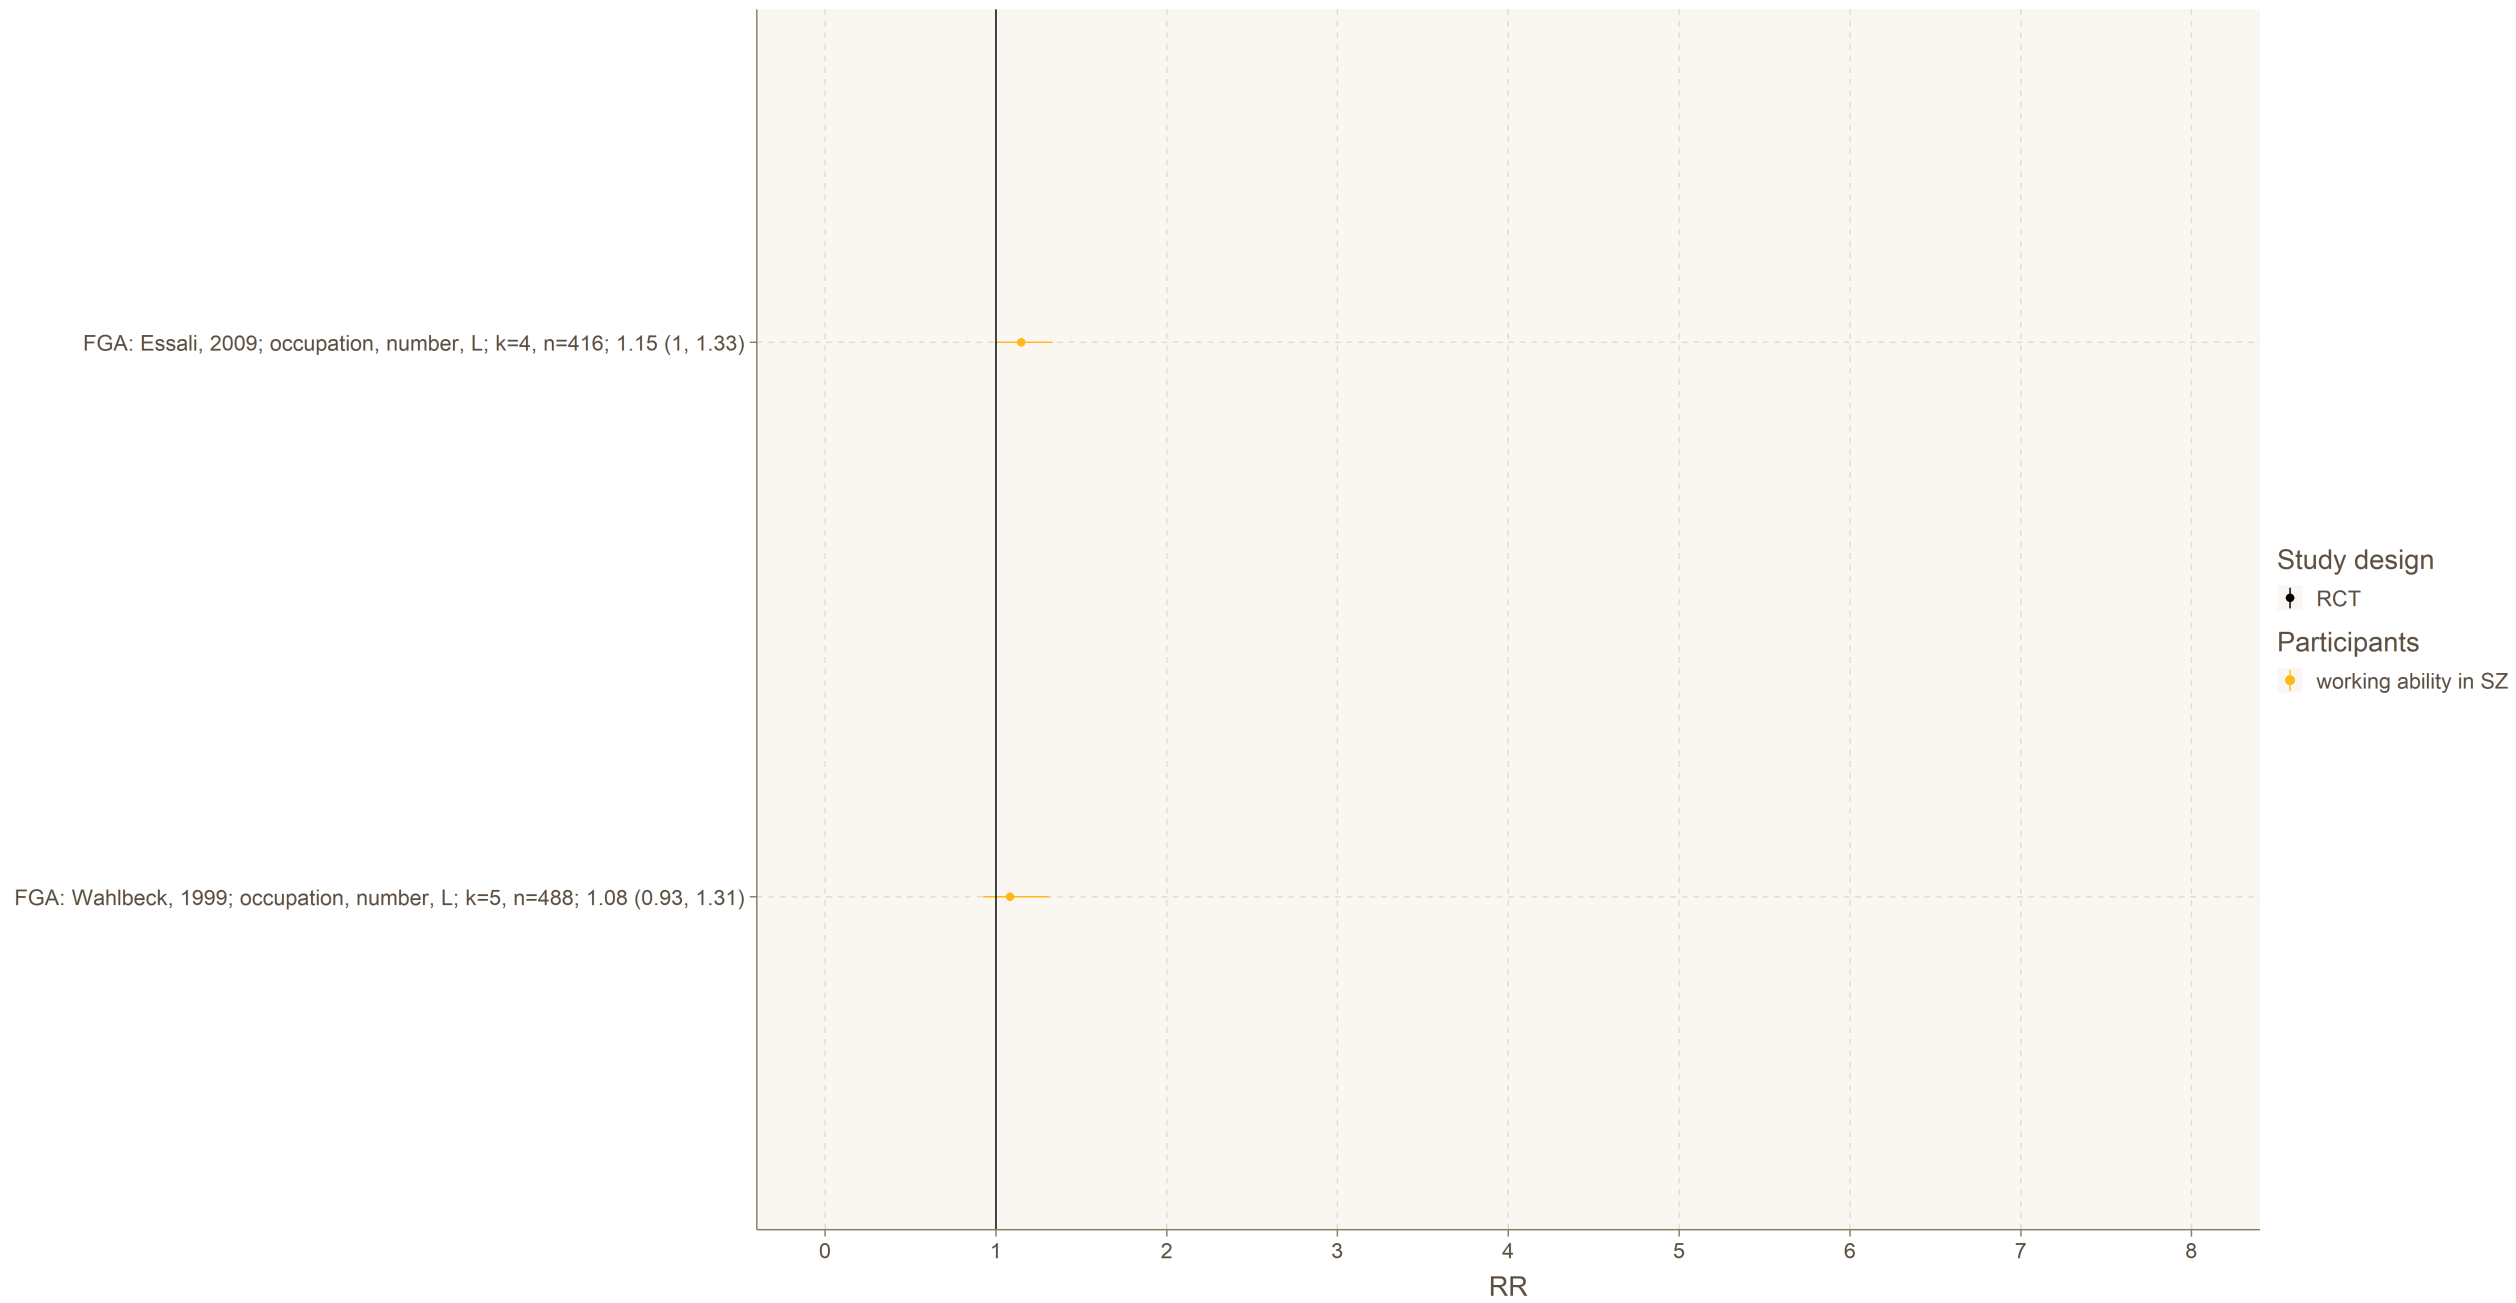

# S 12 Gastrointestinal symptoms and sign (liver functions, nausea/vomiting) as dichotomous outcome

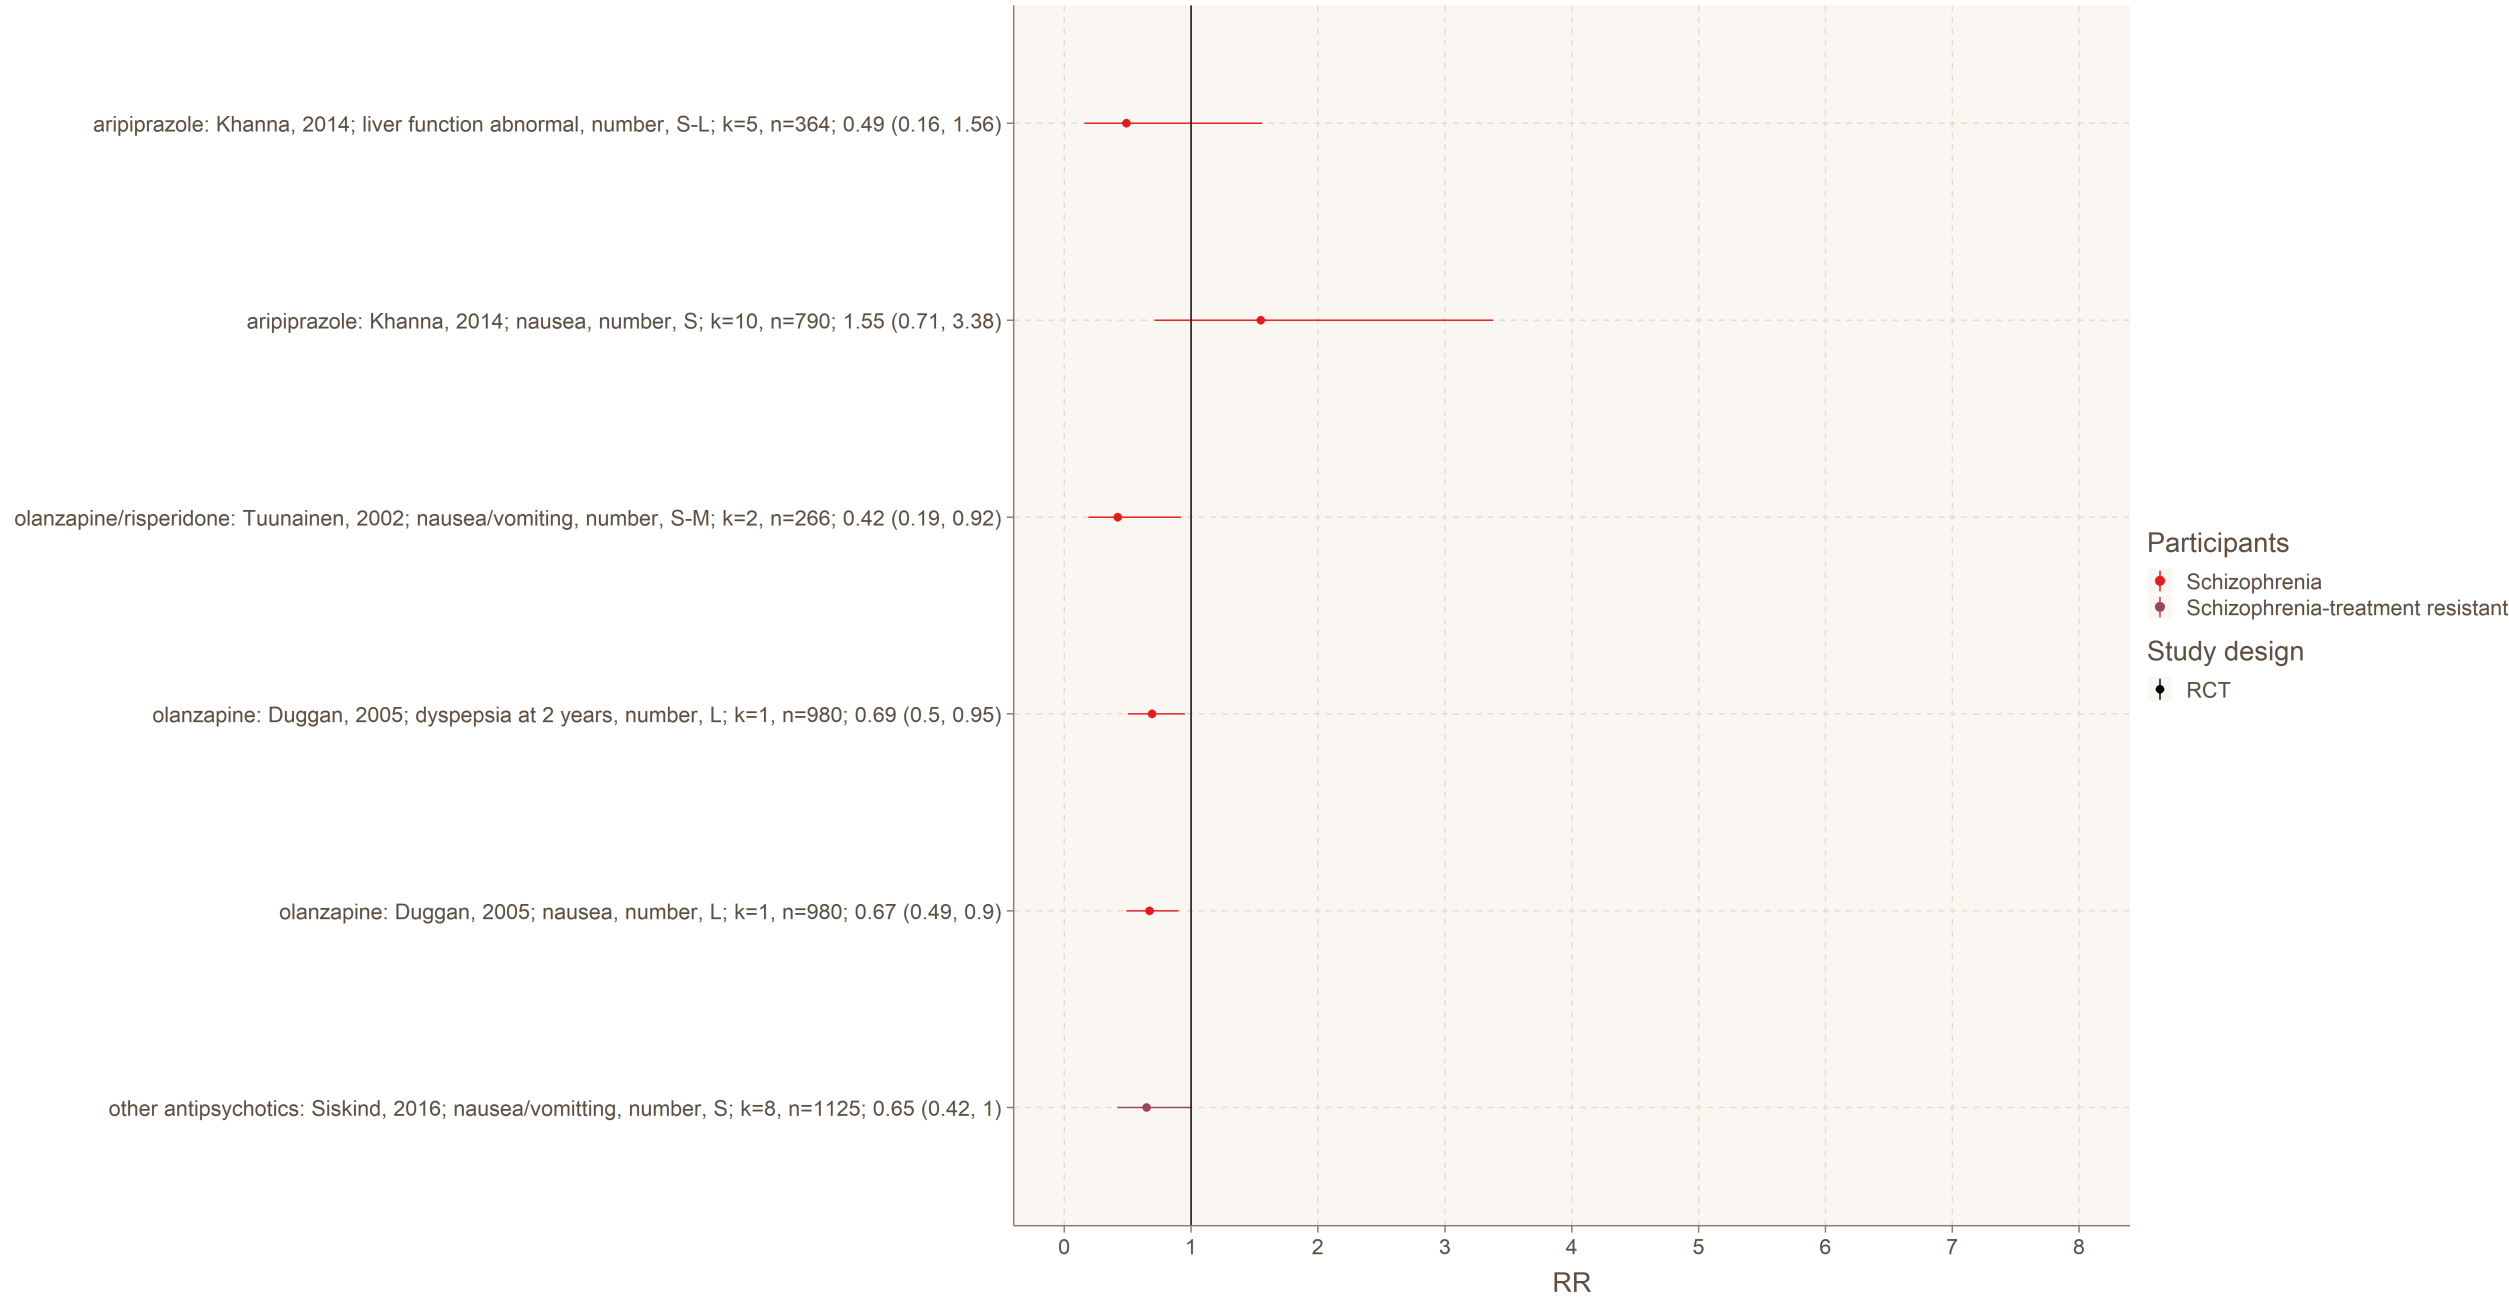

# S 13 Mortality as dichotomous outcome

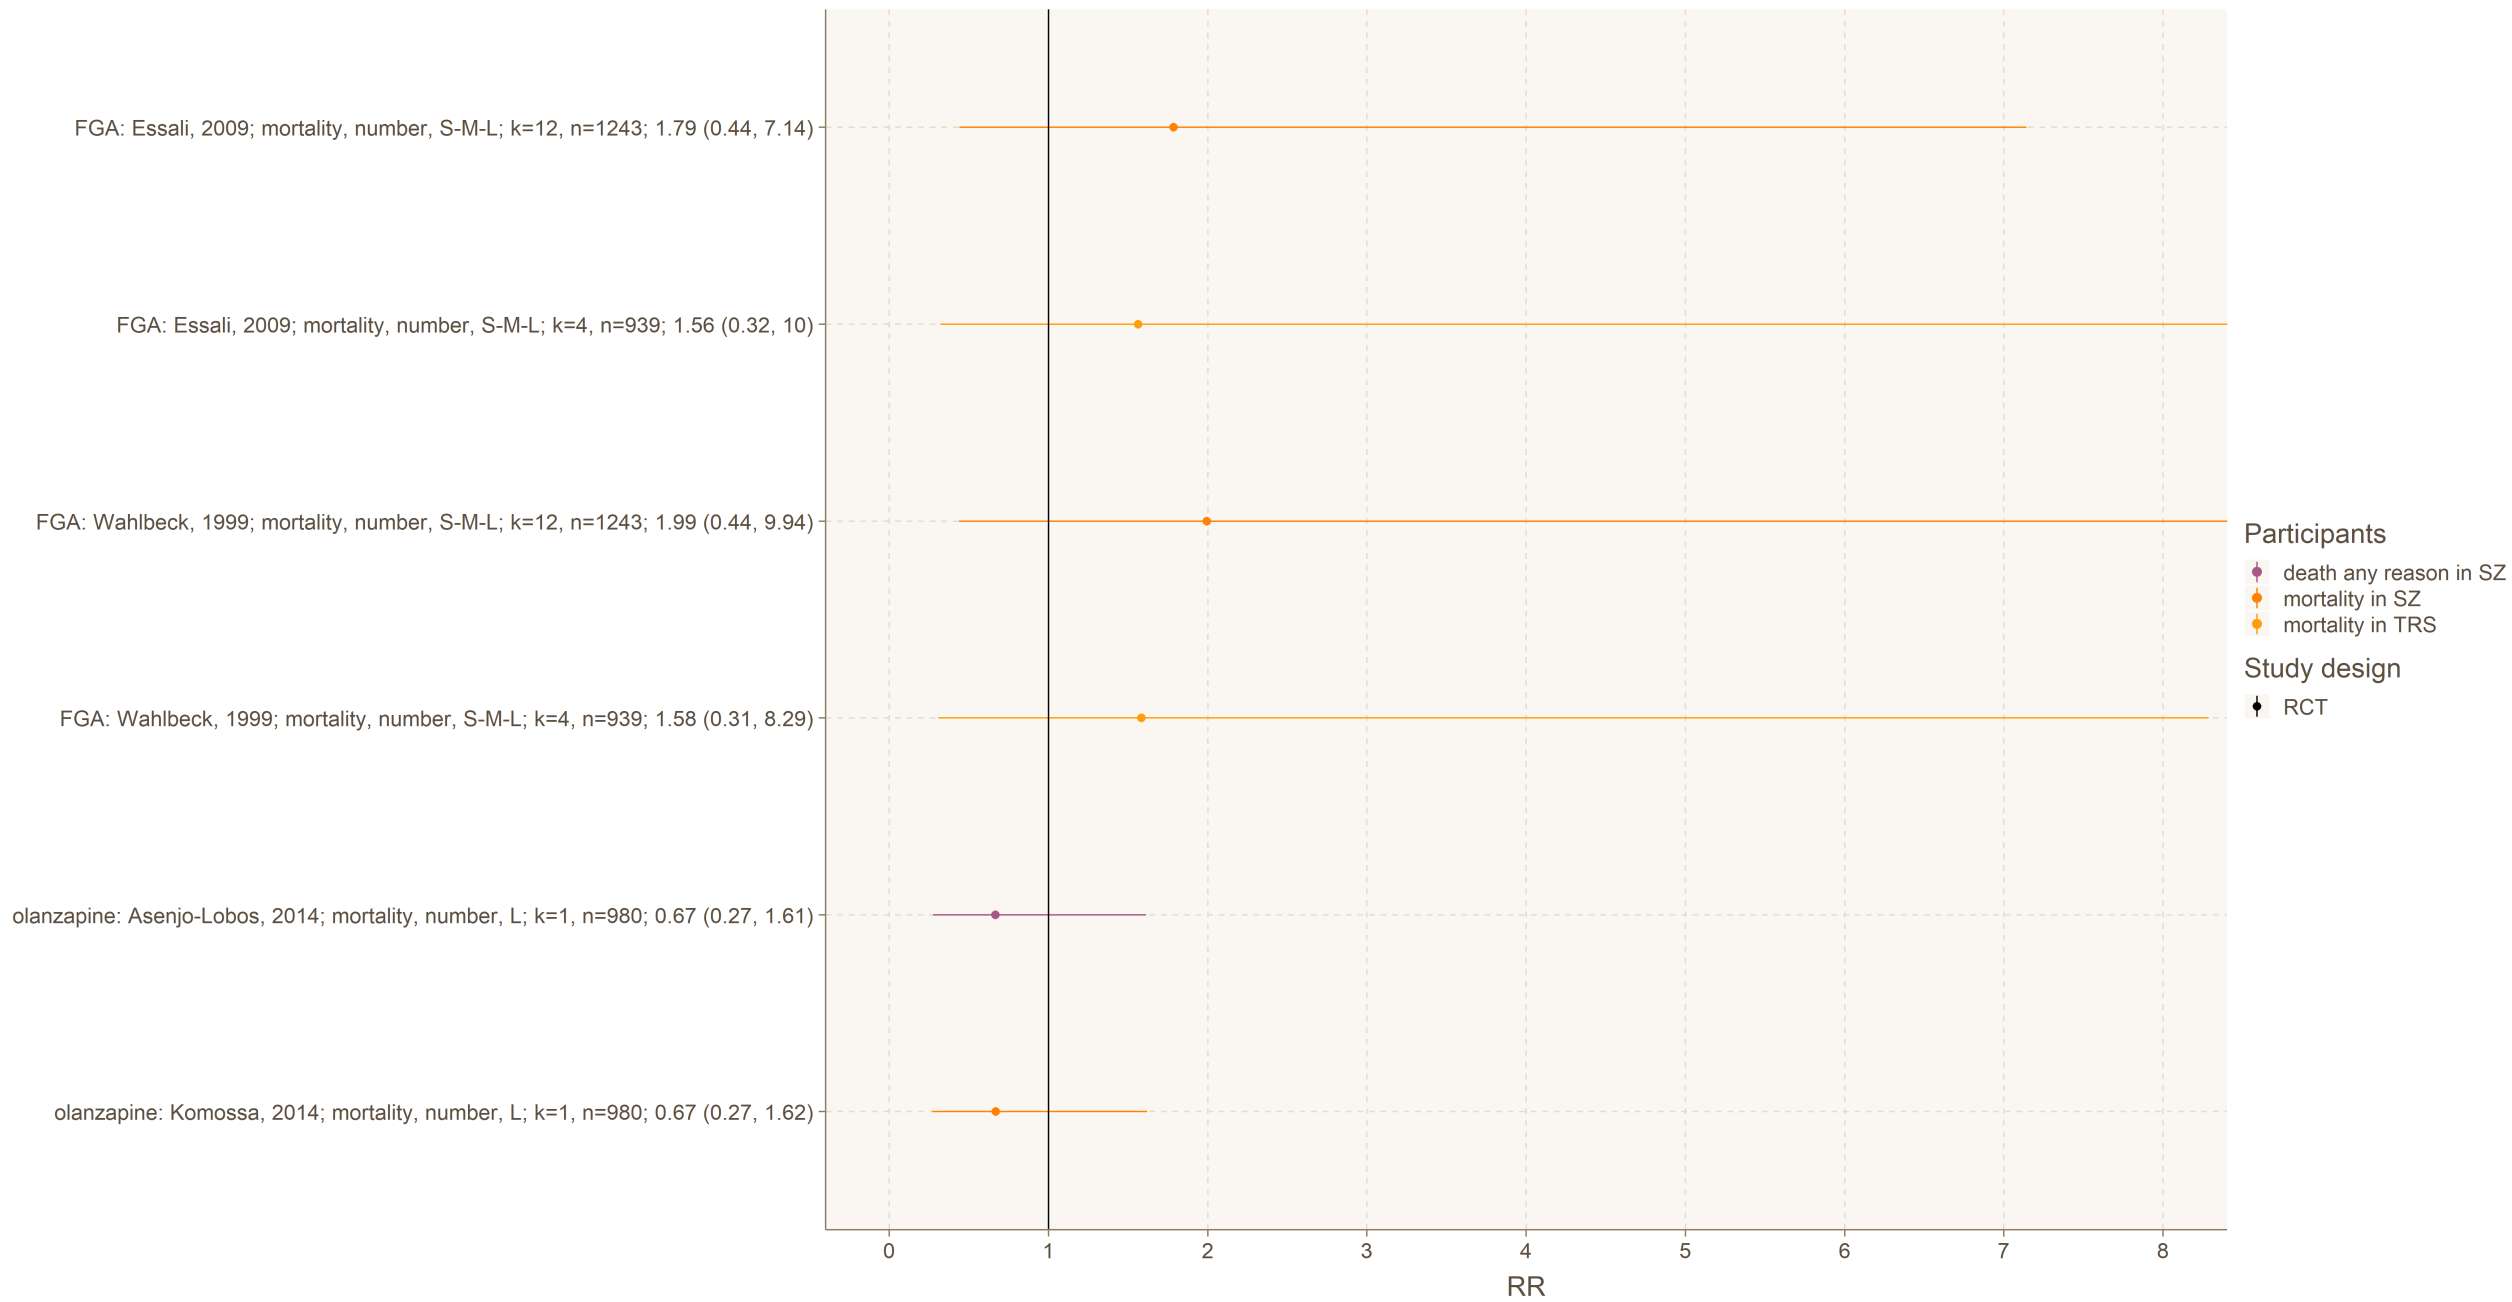

# S 14 Sexual and reproductive side effects as dichotomous outcome

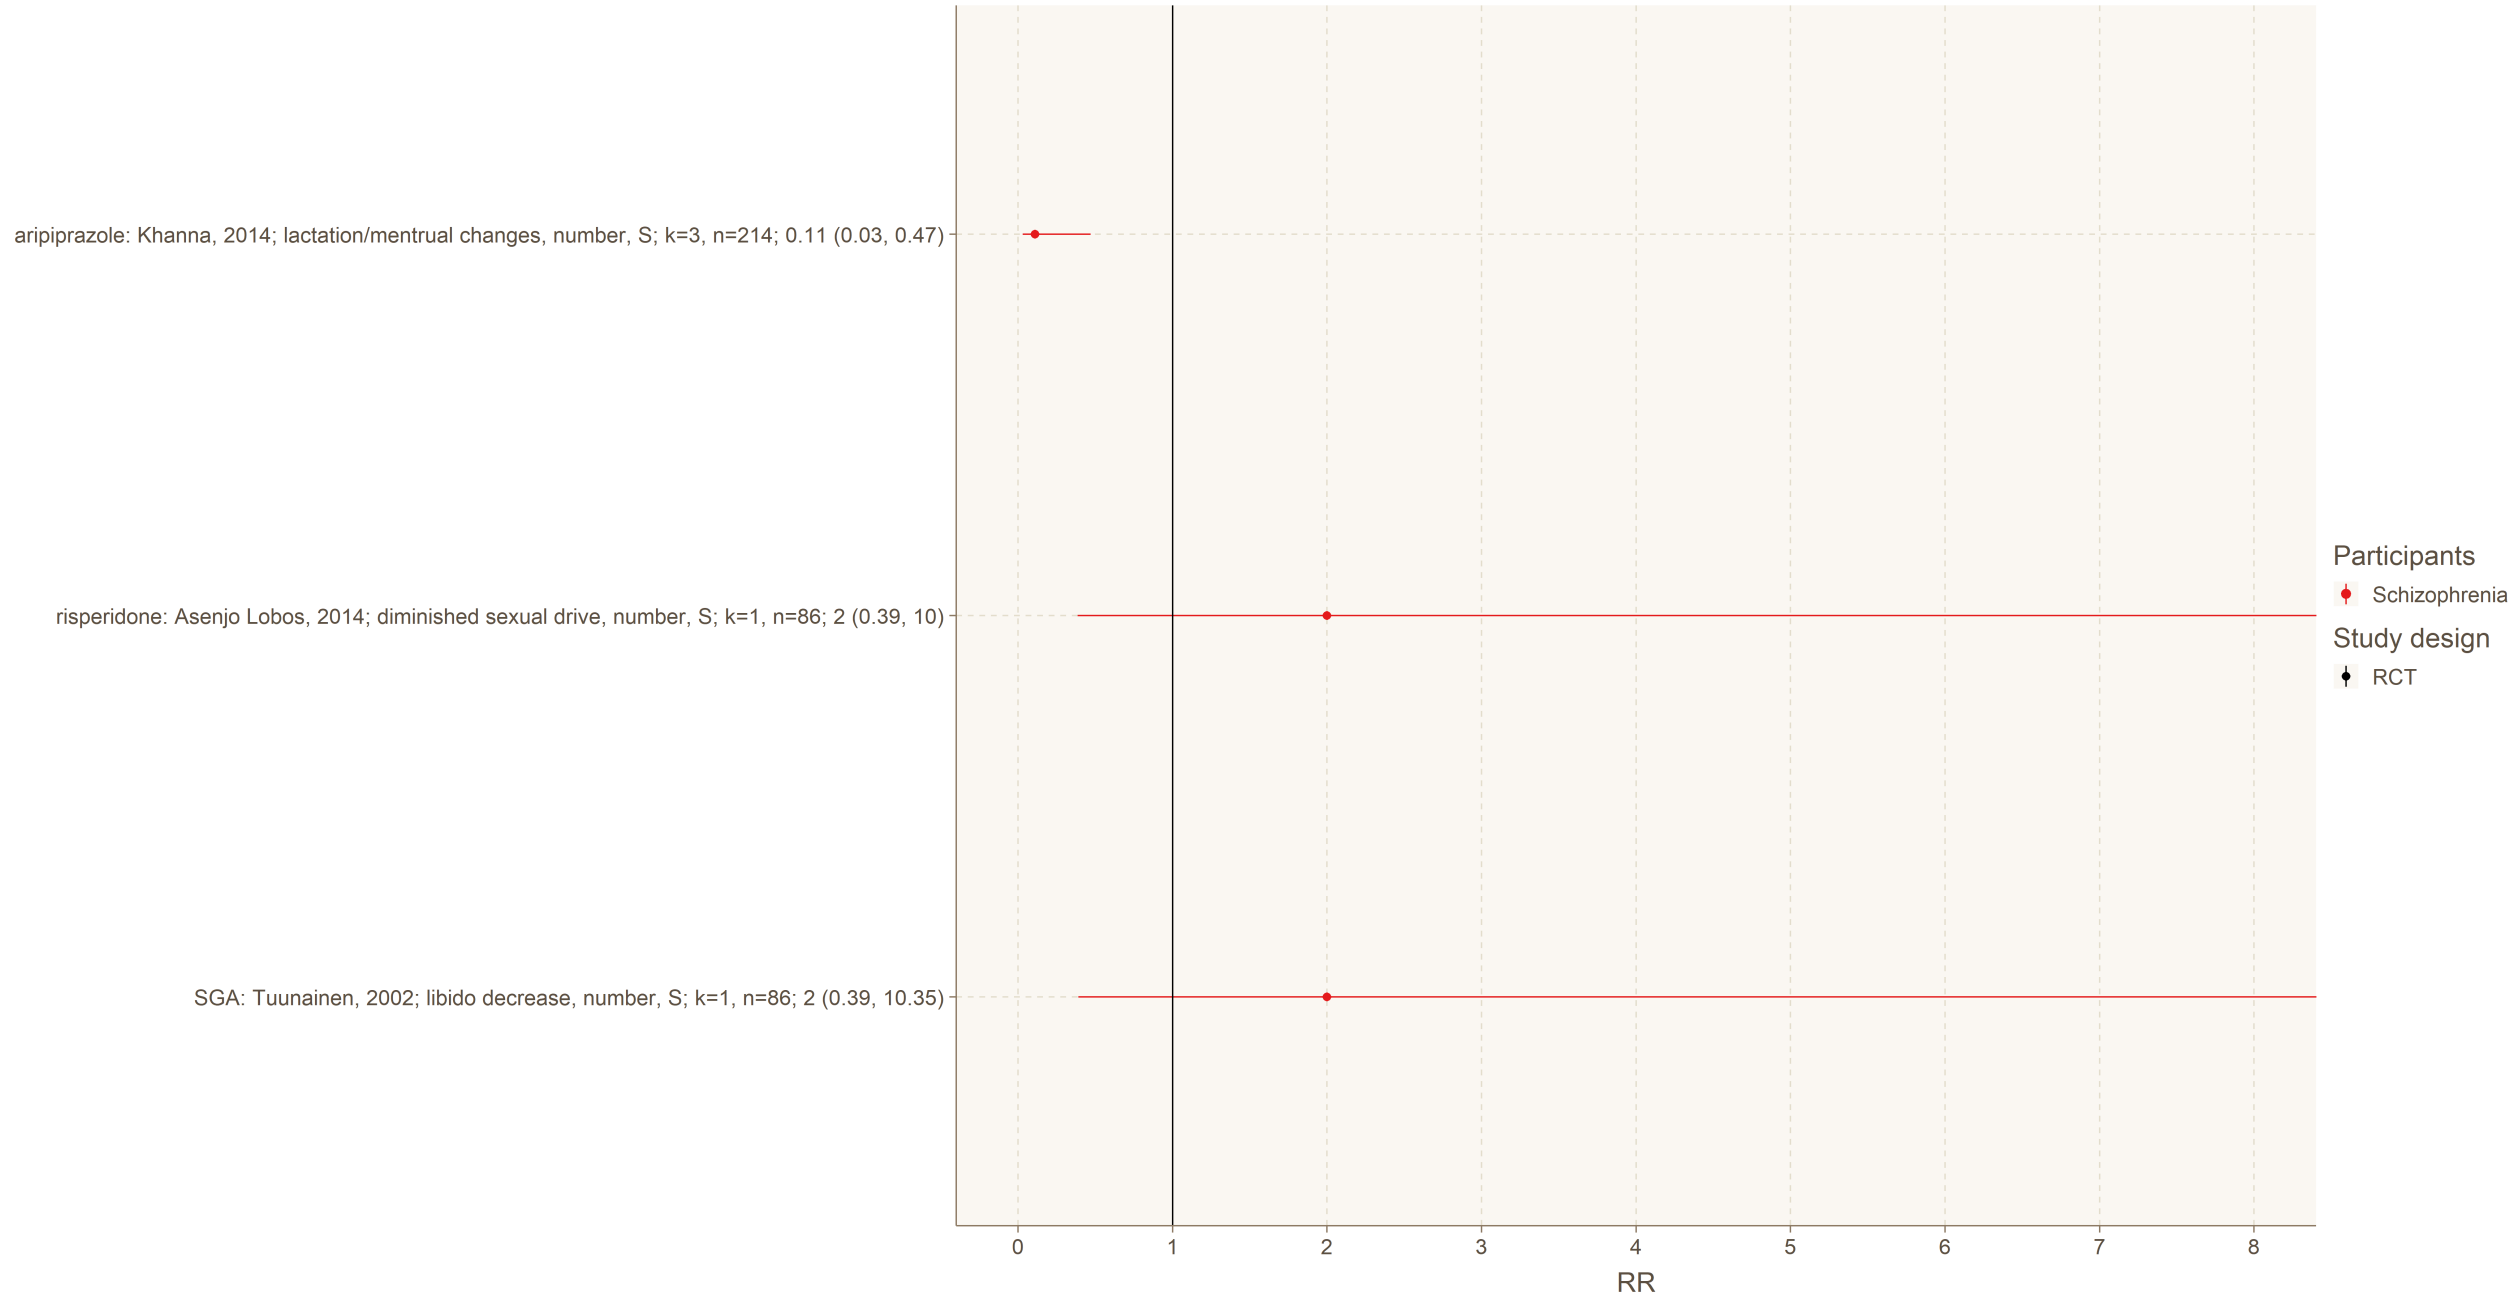

# S 15 Glucose abnormalities as dichotomous outcome

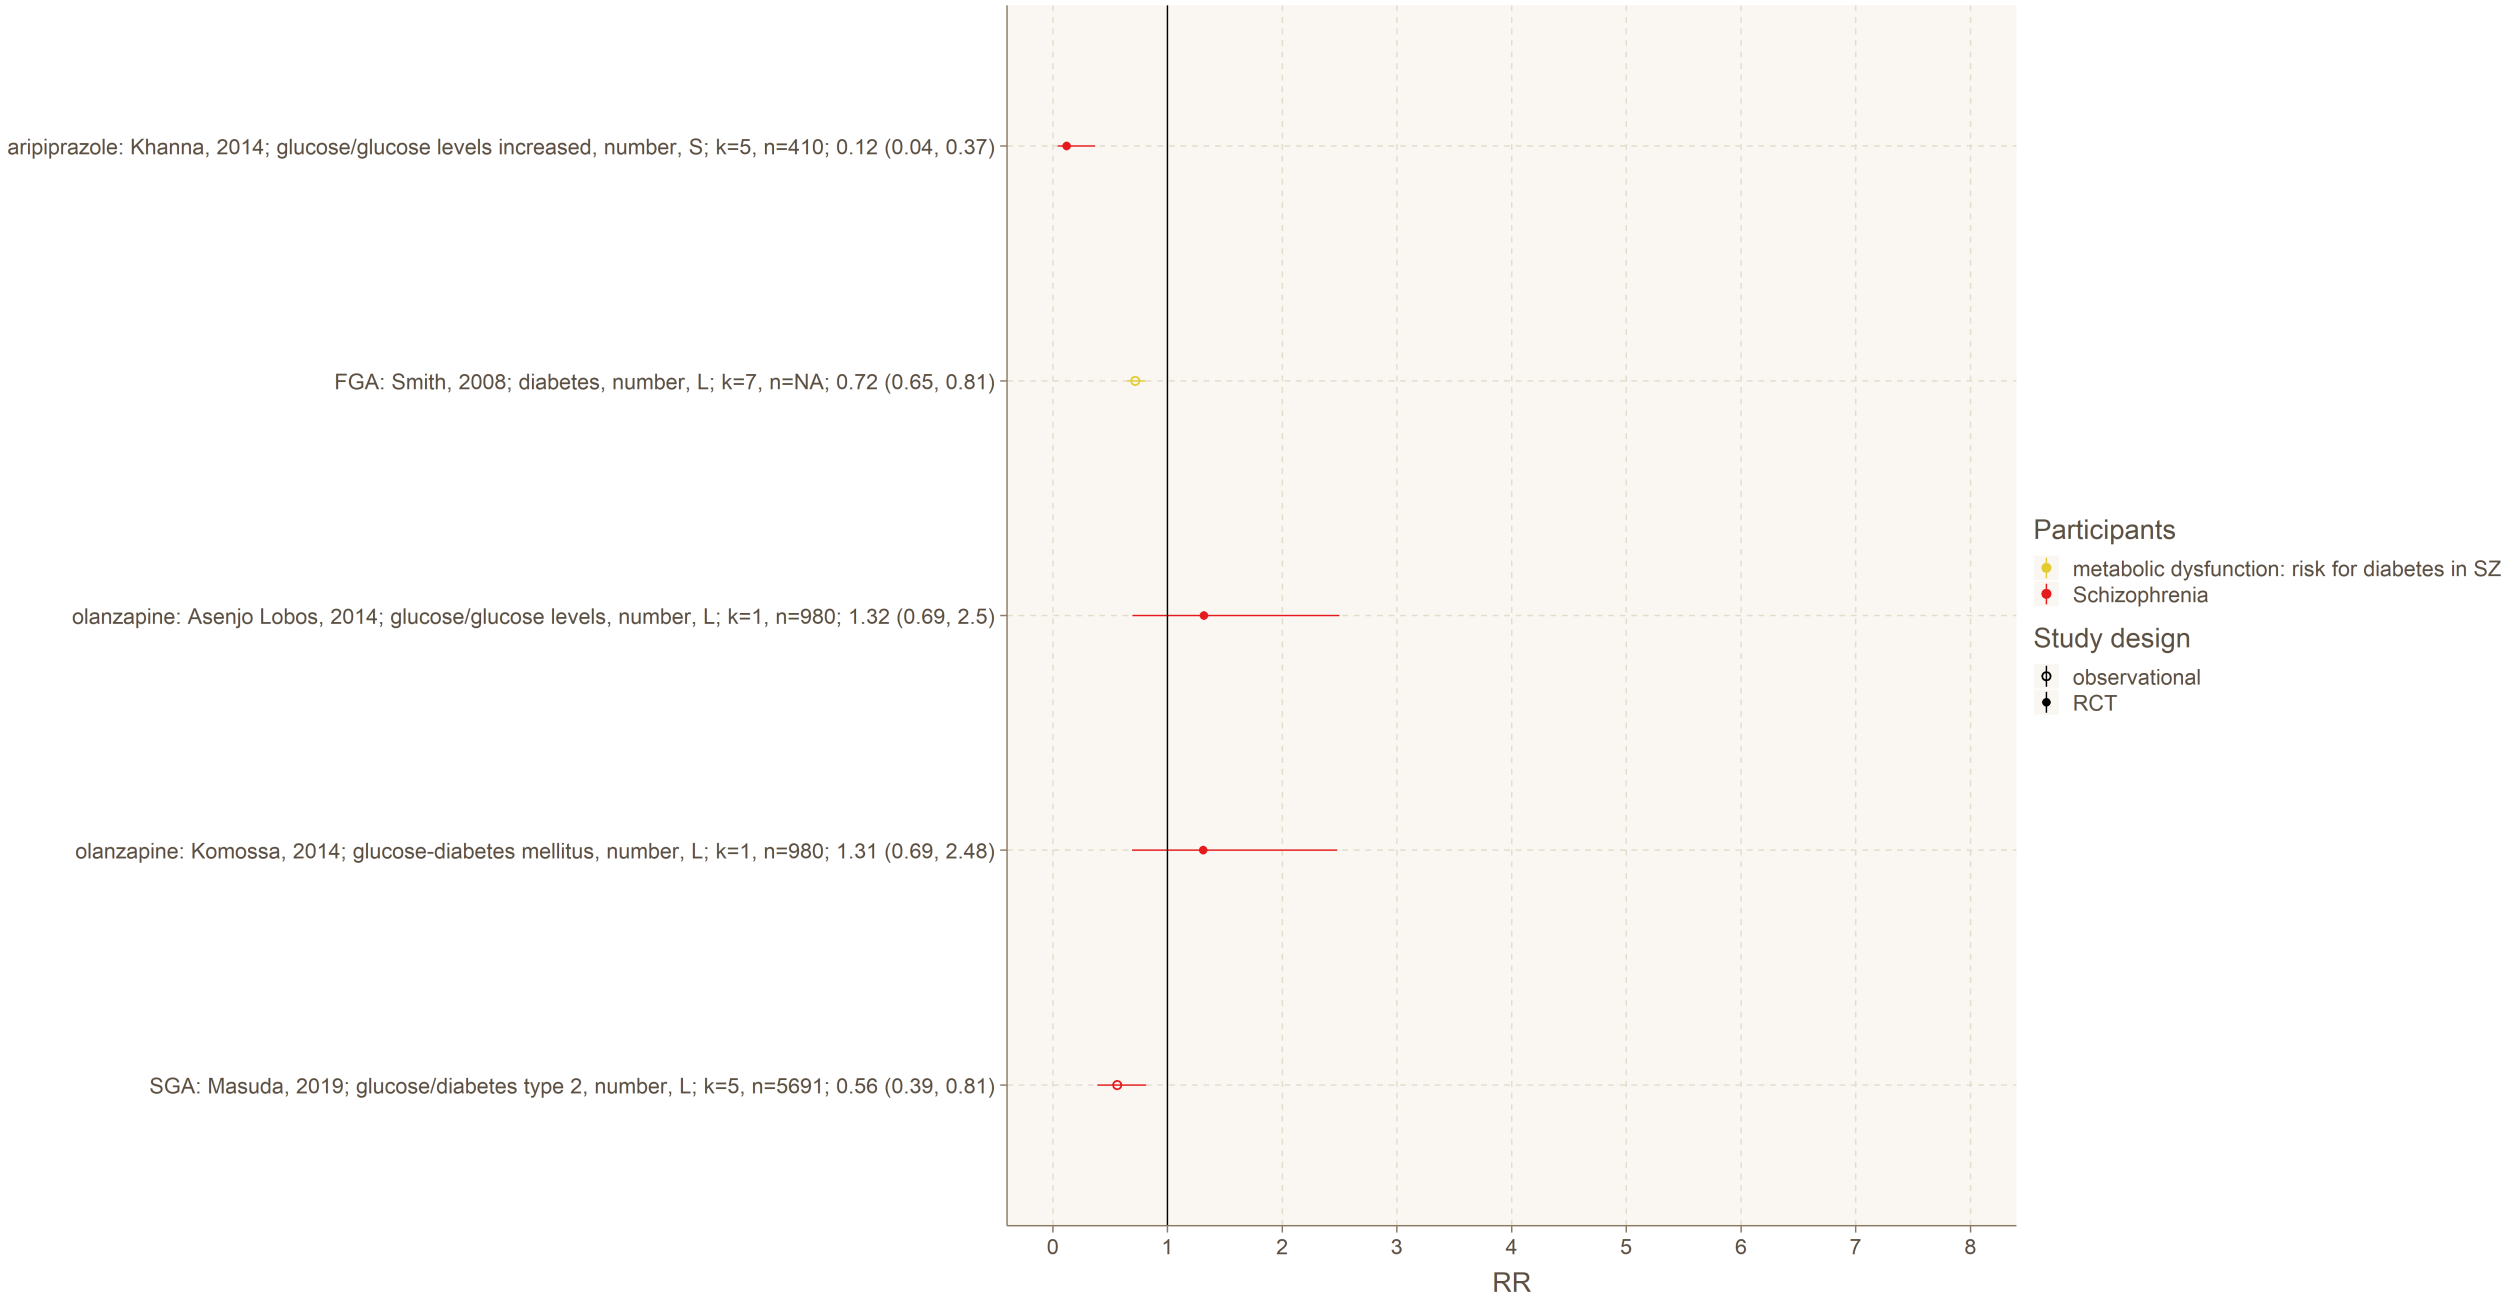

# S 16 Hospitalization as dichotomous outcome

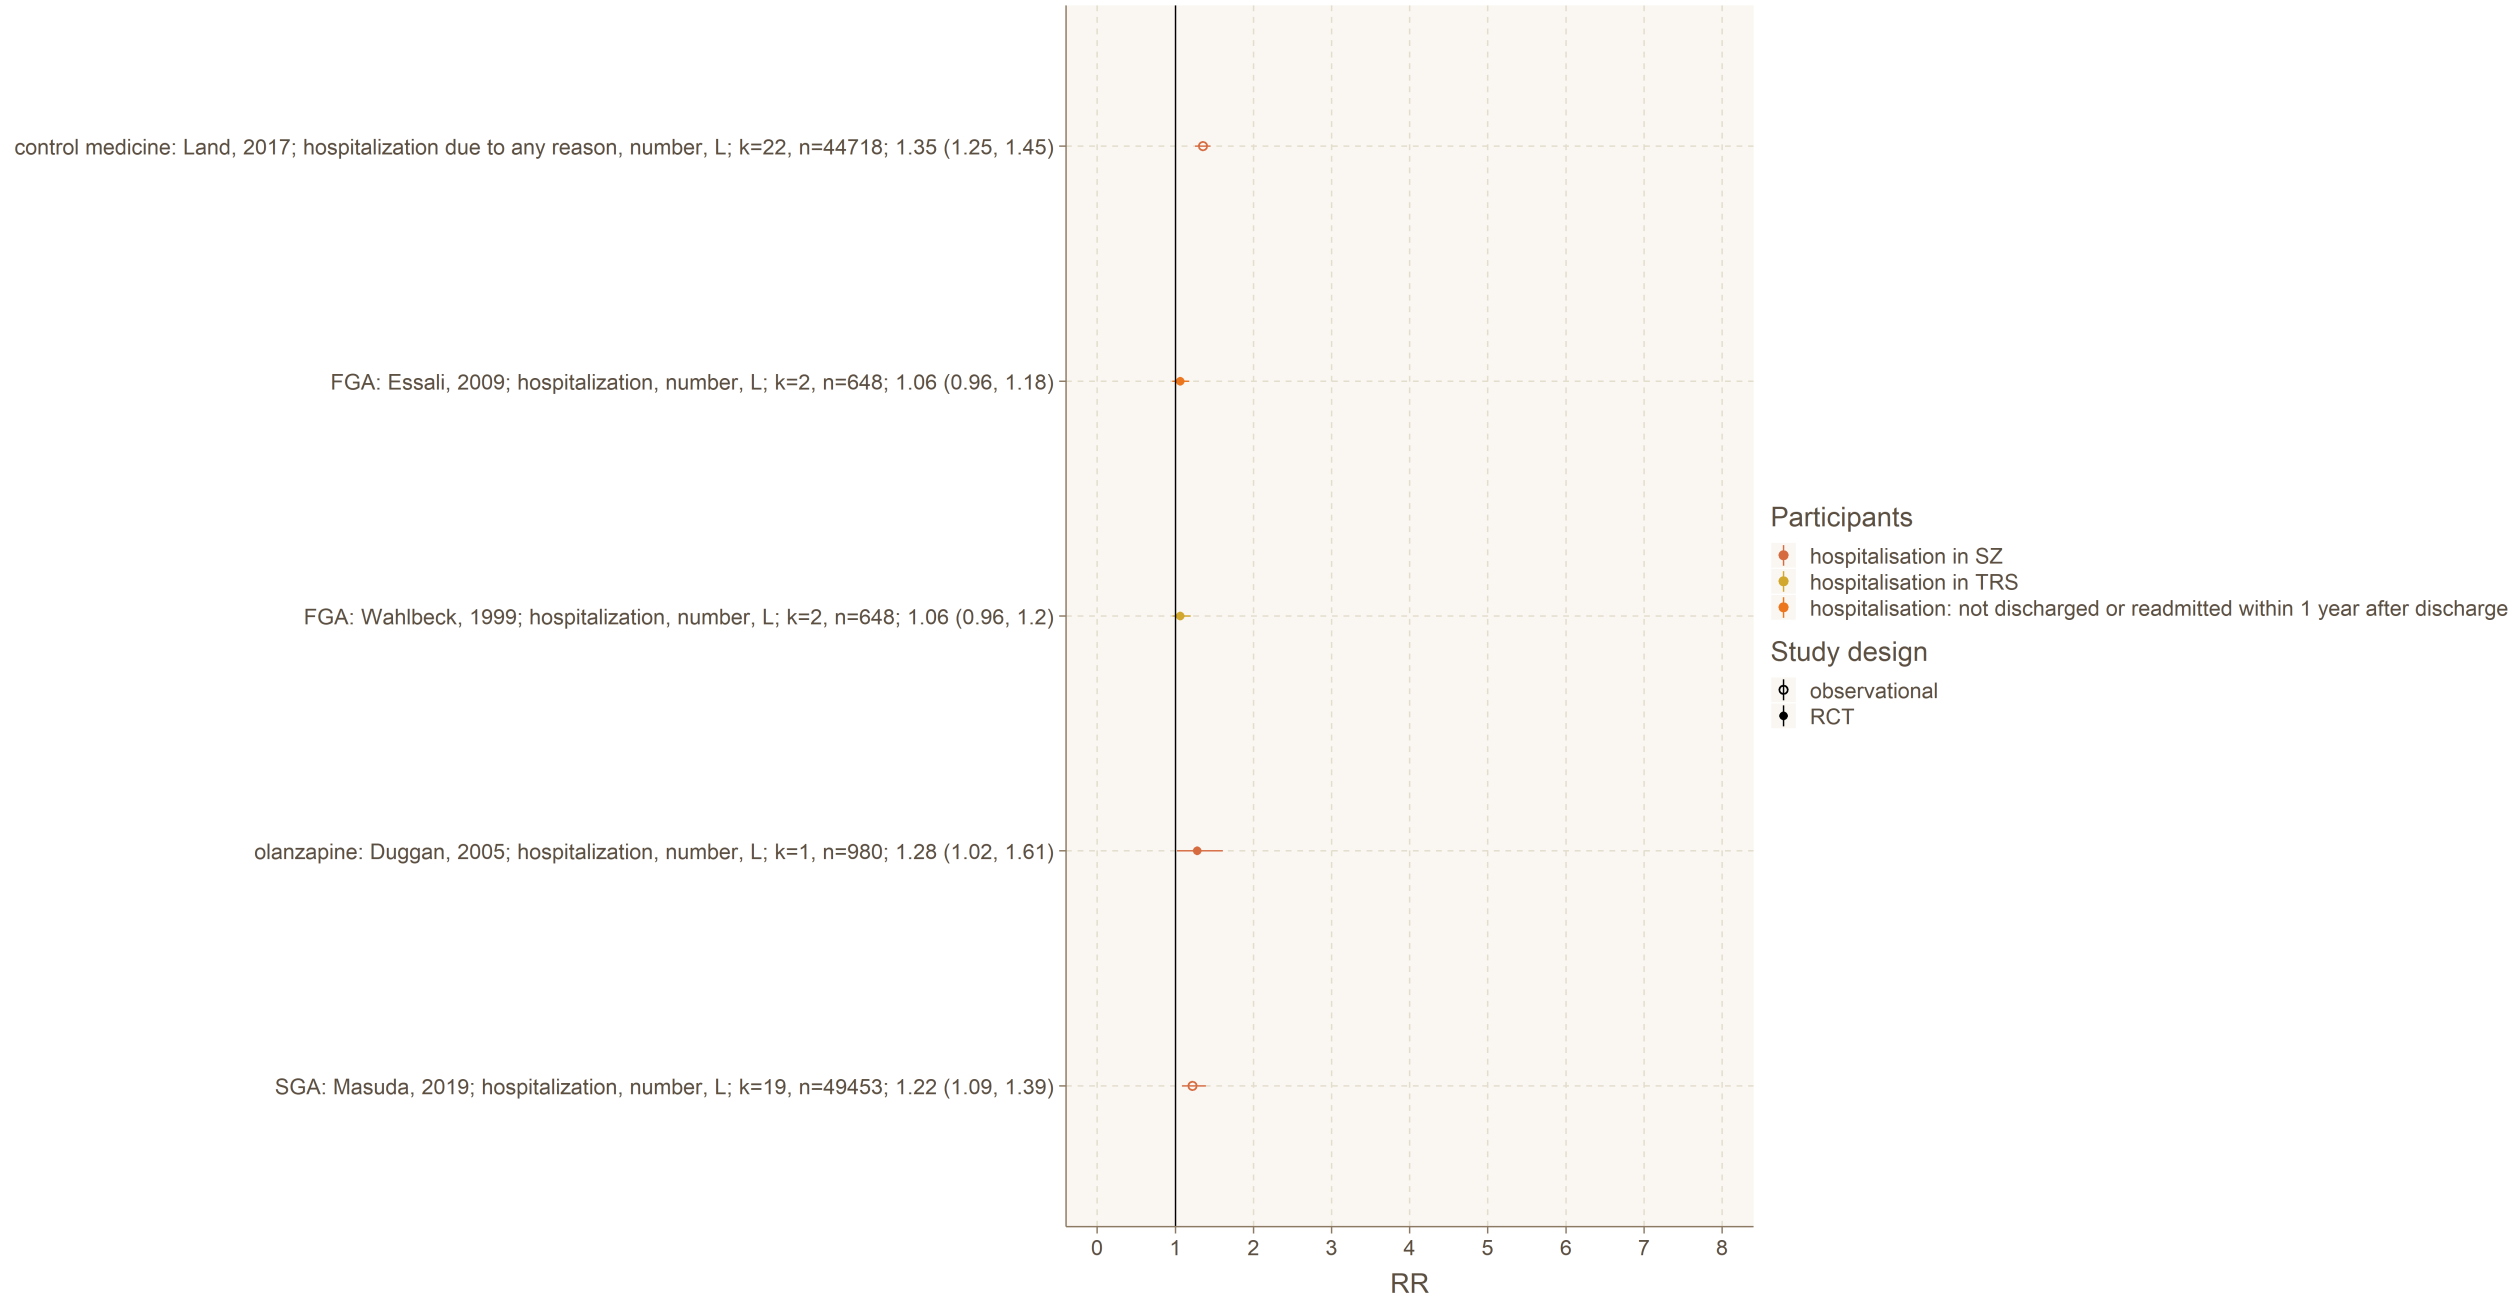



# S 17 Suicidality as dichotomous outcome

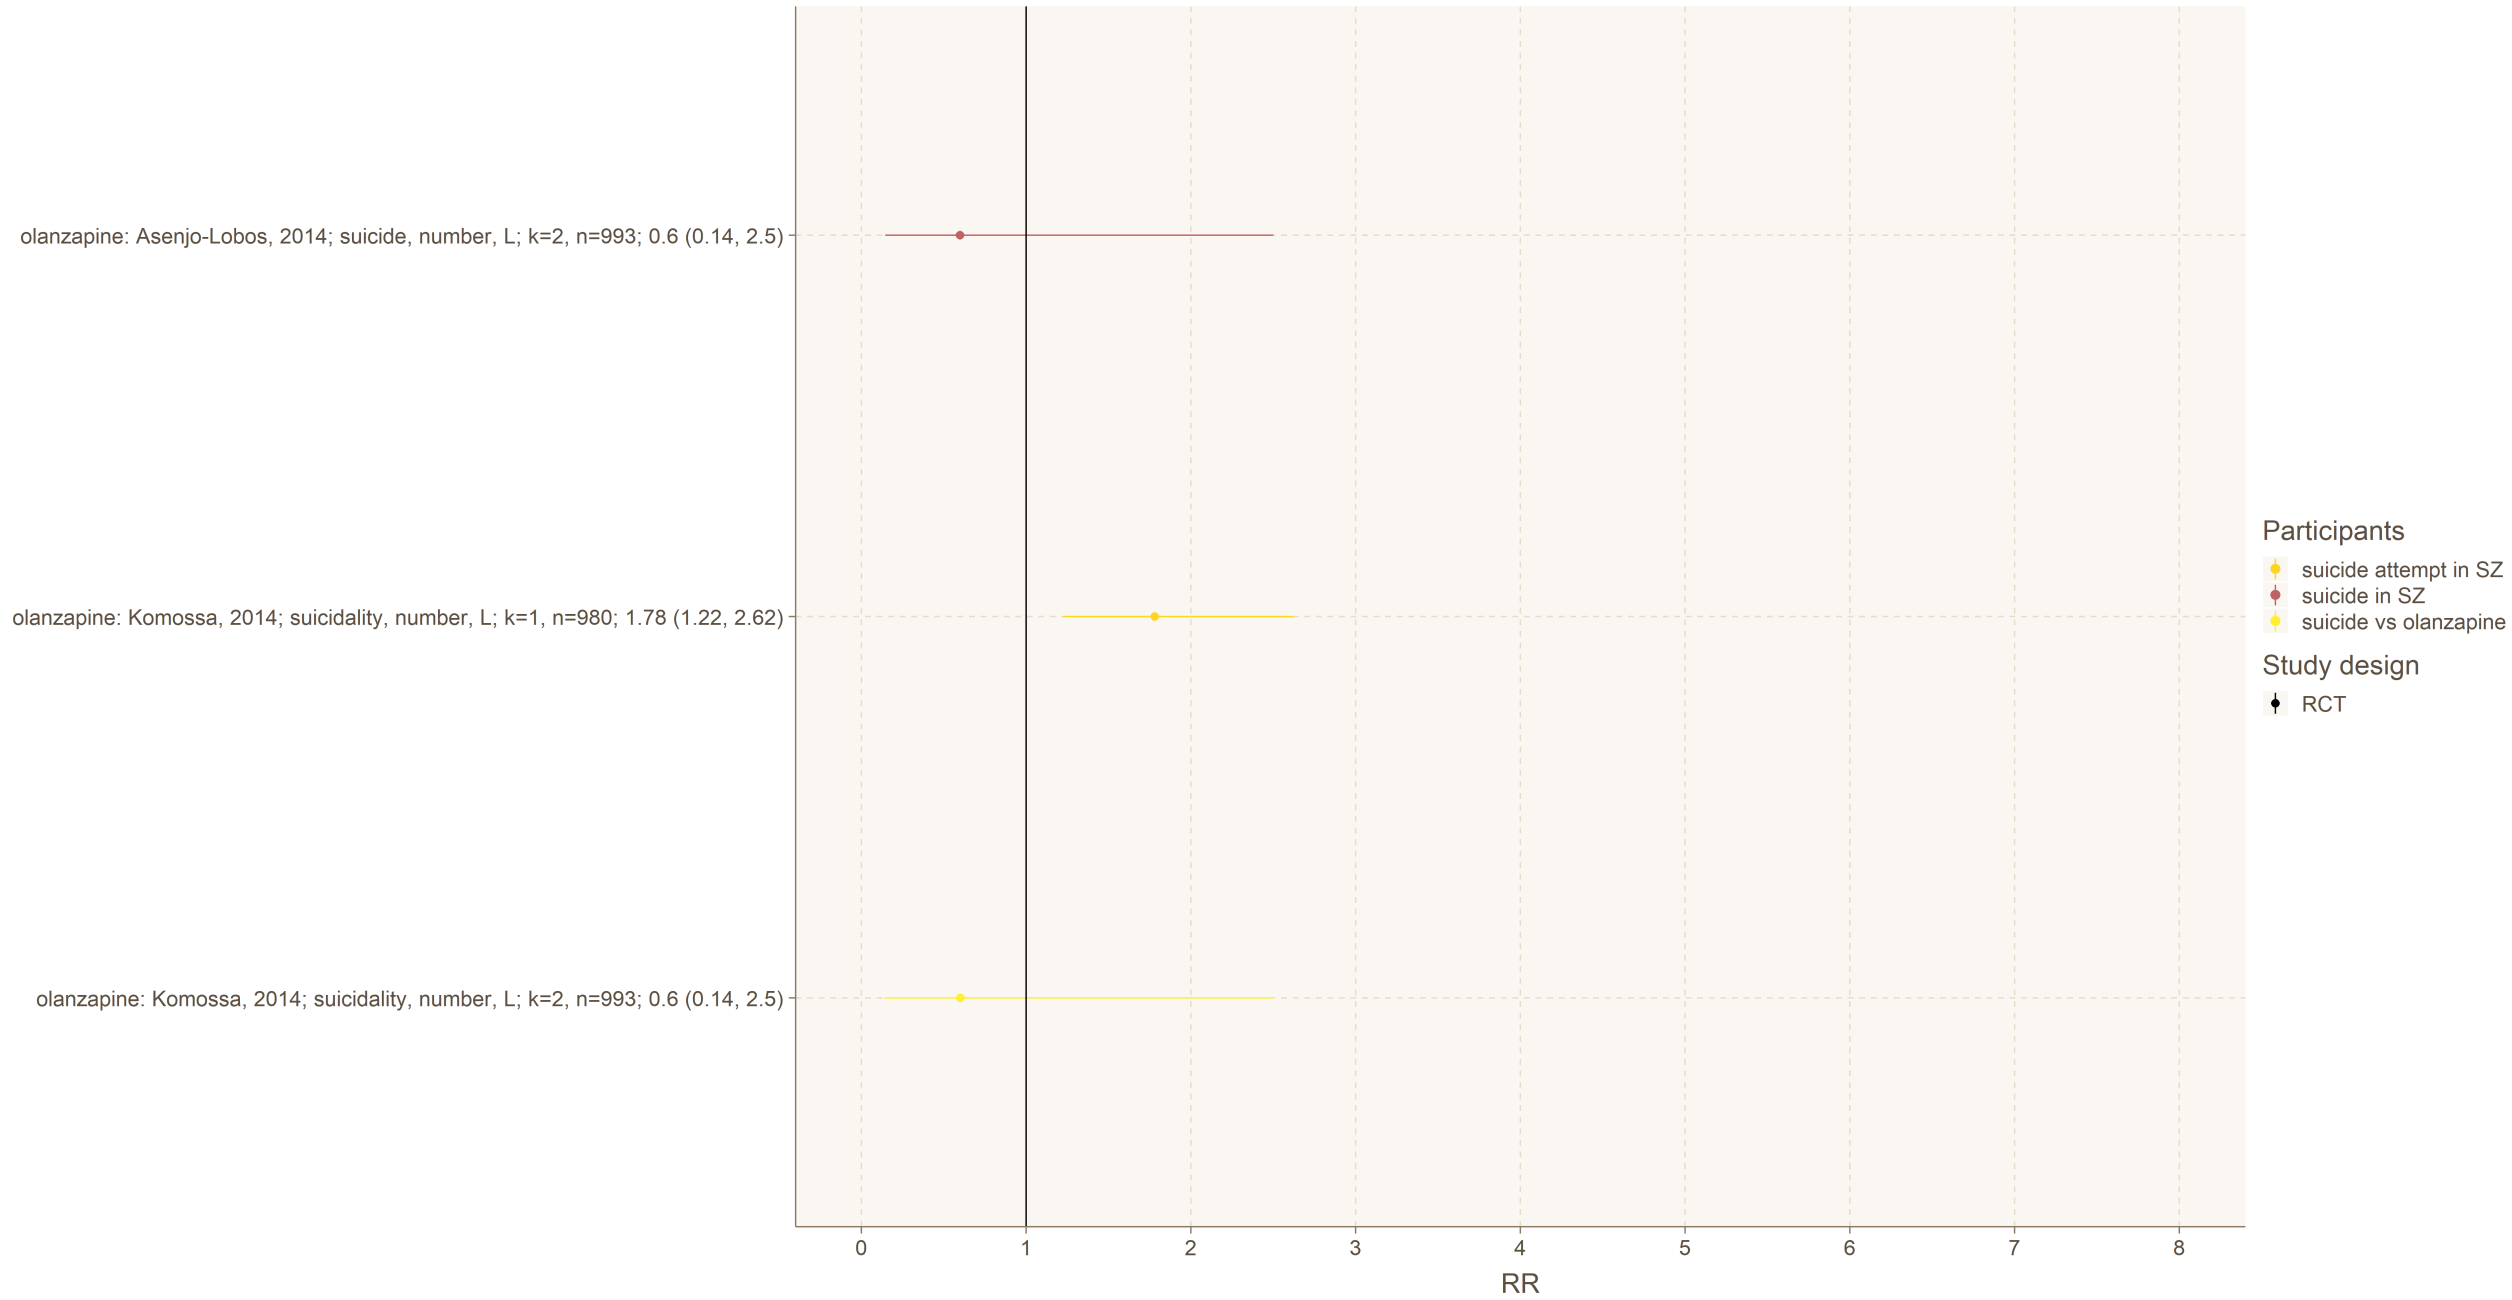

# S 18 Efficacy of treatment for hypersalivation as continuous outcome

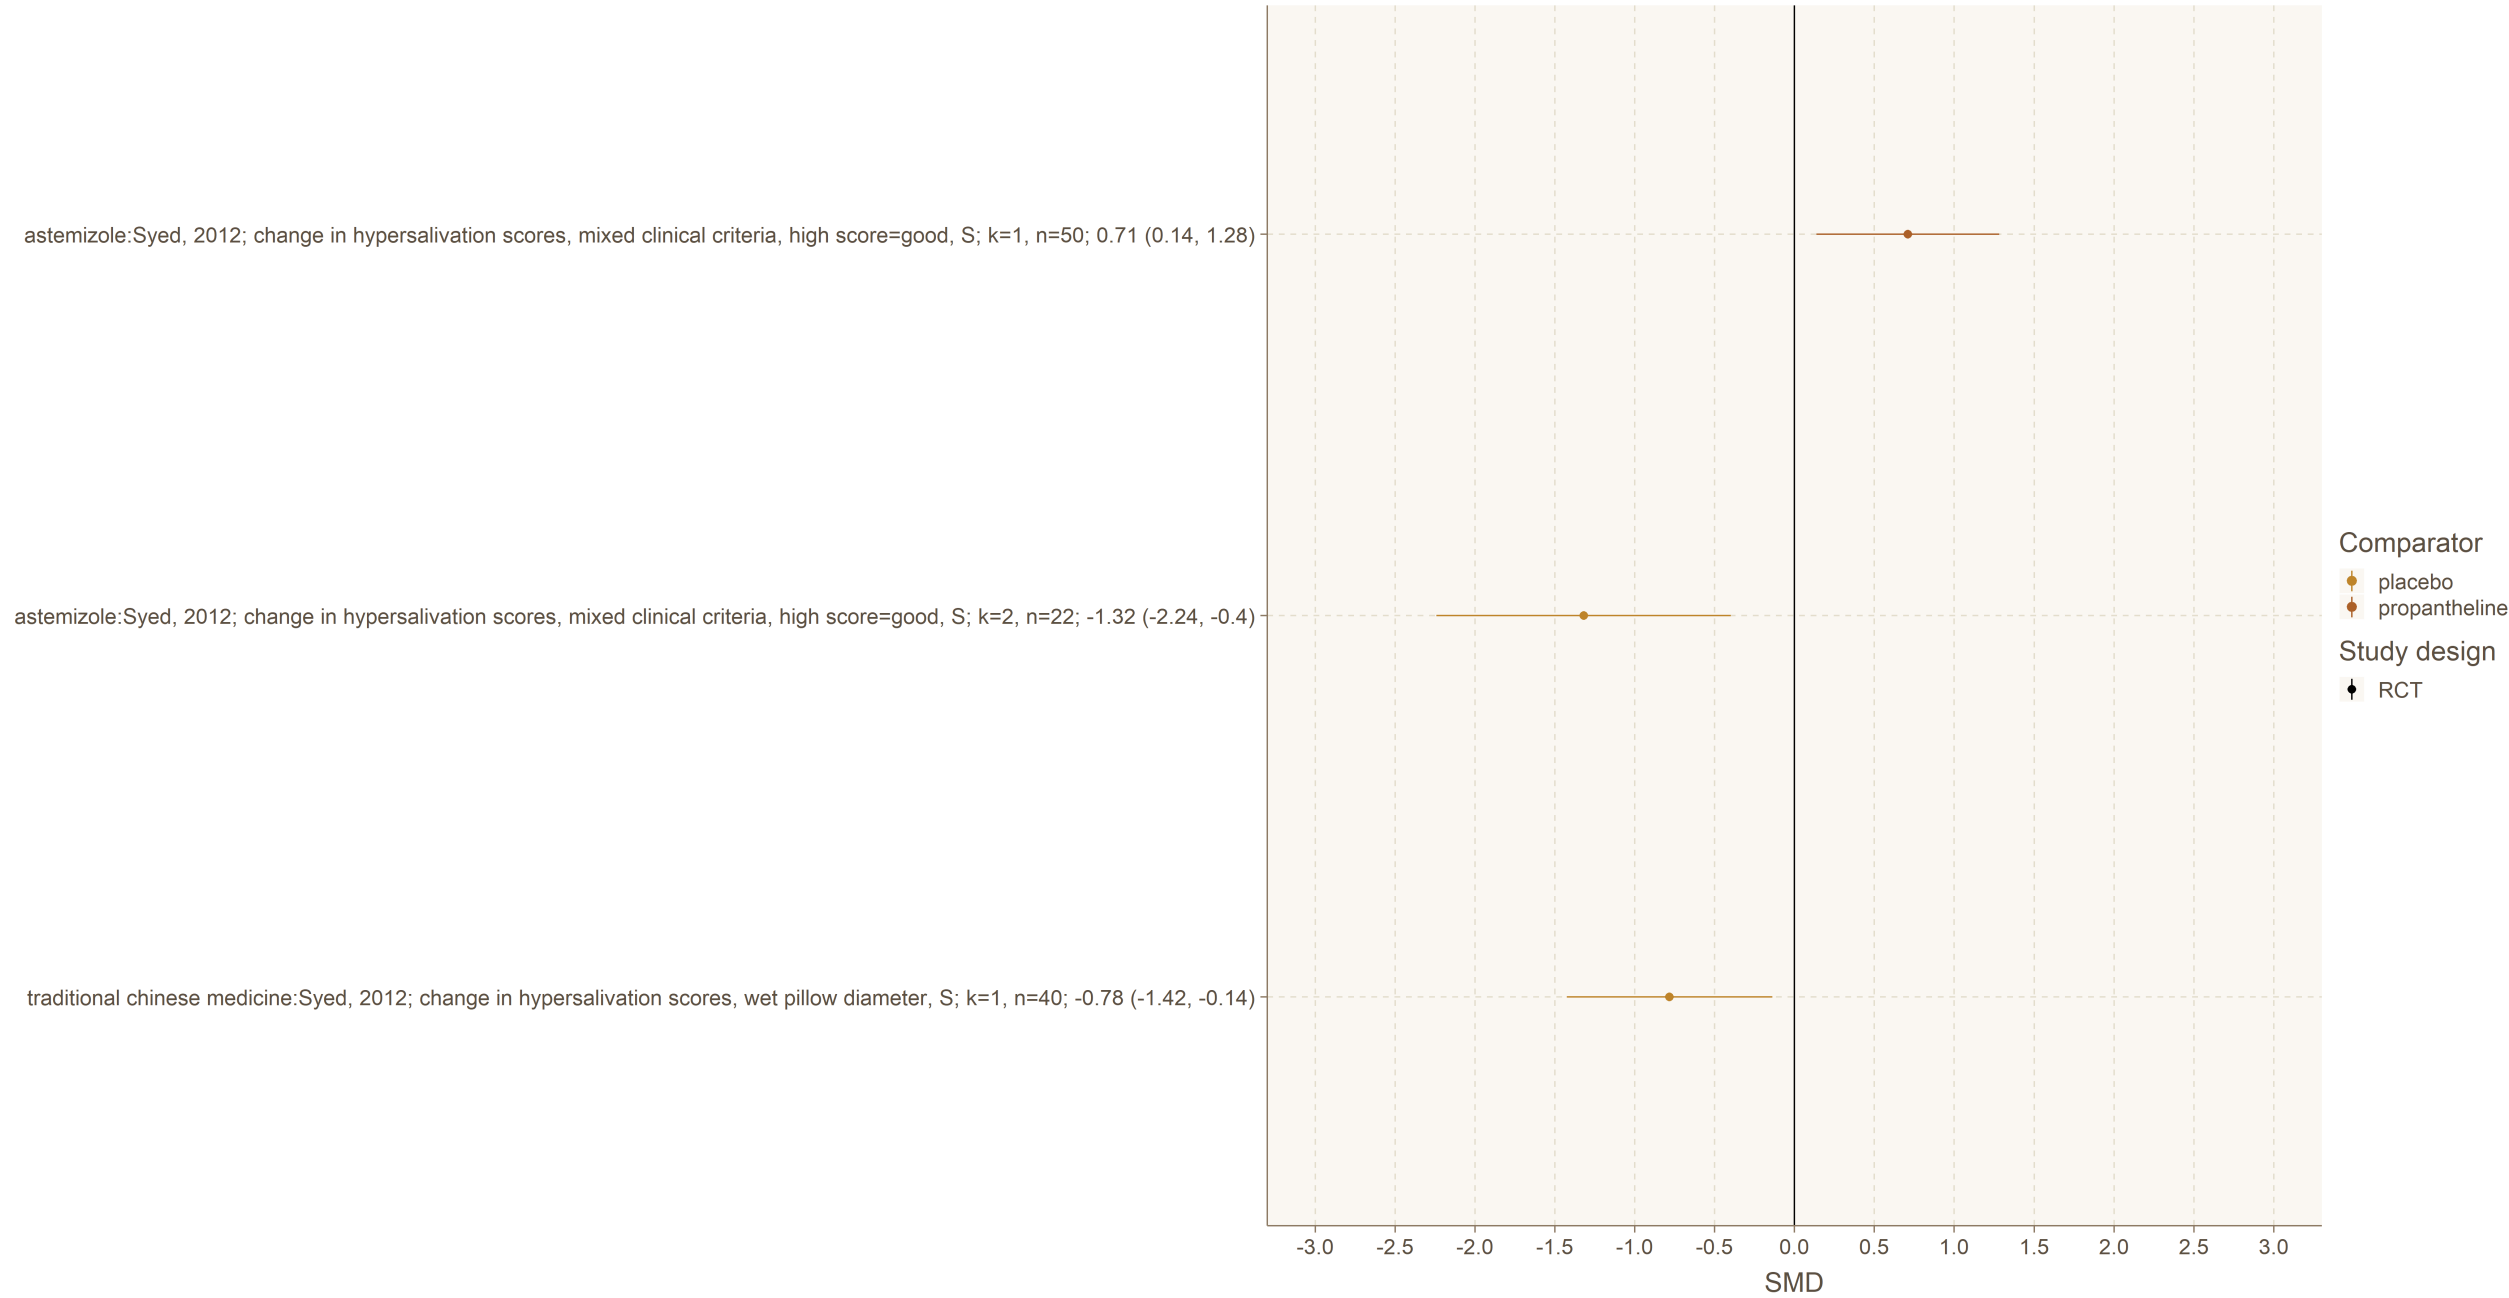

# S 19 Efficacy of treatment for constipation as dichotomous outcome

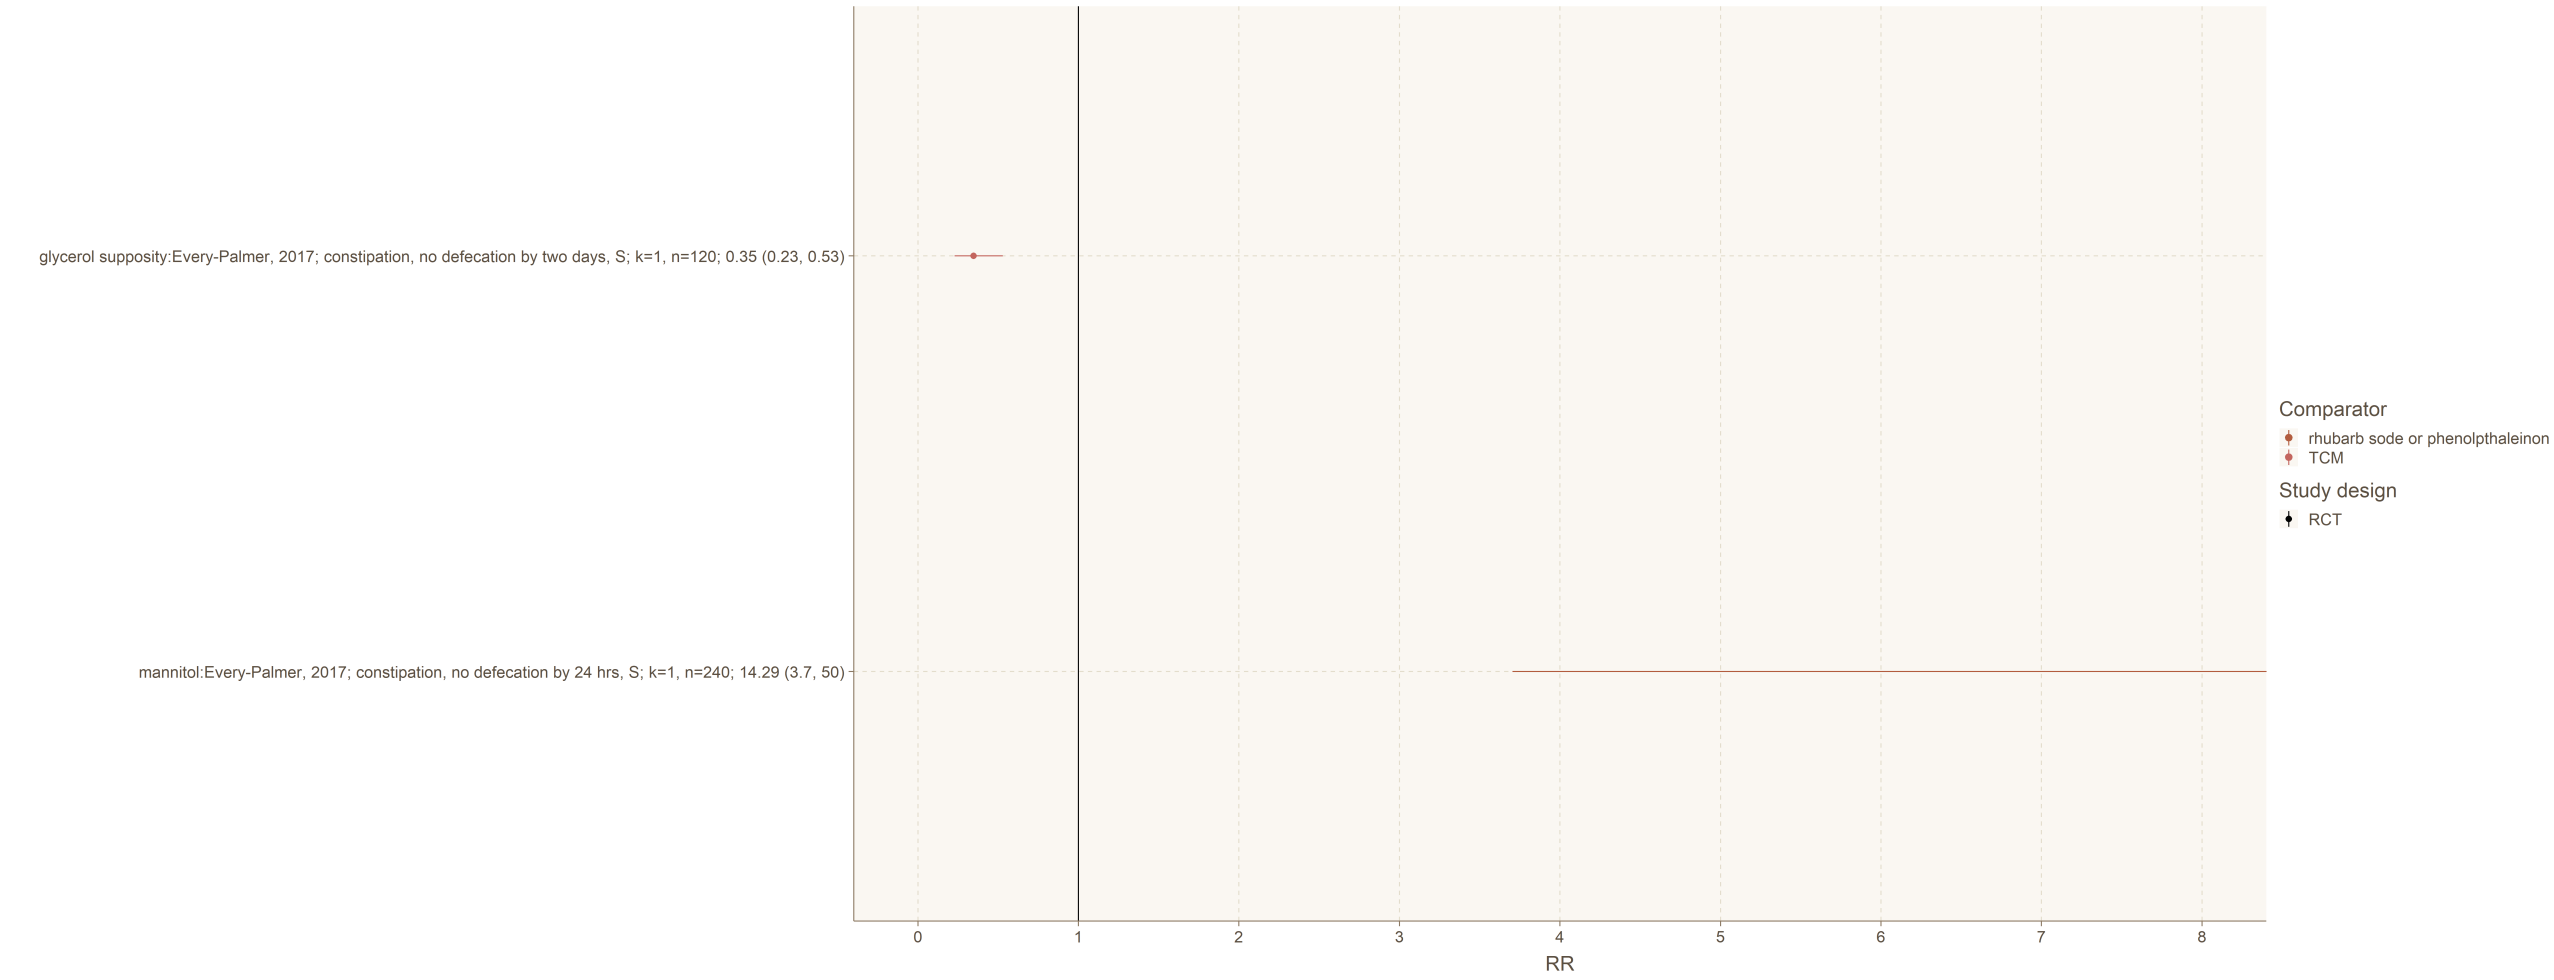

Supplement: 41398_2021_1613_MOESM4_ESM.pdf [file 41398_2021_1613_MOESM4_ESM.pdf]
